# Supplementary material
Source: PubMed Central journal article supplement (PMC503747)
Supplement: pnas_101_30_11105__2.pdf [file pnas_101_30_11105__2.pdf]

*Salmonella typhi*  
*Salmonella typhimurium LT2*  
*Escherichia coli O157:H7*  
*Escherichia coli O157:H7\_E DL933*  
*Escherichia coli CFT073*  
*Escherichia coli K12*  
*Shigella flexneri\_2a*  
*Shigella flexneri\_2a\_2457T*  
*Yersinia pestis CO92*  
*Yersinia pestis KIM*  
*Yersinia enterocolitica*  
*Photobacterium luminescens*  
*Pseudomonas syringae*  
*Pseudomonas aeruginosa*  
*Pseudomonas putida KT2440*  
*Vibrio parahaemolyticus*  
*Vibrio cholerae*  
*Vibrio vulnificus CMC96*  
*Stenotrophomonas maltophilia*  
*Pasteurella multocida*  
*Xylella fastidiosa Temecula1*  
*Xylella fastidiosa*  
*Xanthomonas campestris*  
*Xanthomonas citri*  
*Agrobacterium tumefaciens C58\_C*  
*Agrobacterium tumefaciens C58\_U*  
*Sinorhizobium meliloti*  
*Bradyrhizobium japonicum*  
*Rhizobium loti*  
*Mesorhizobium loti*  
*Bruceella melitensis*  
*Neisseria meningitidis MC88*  
*Neisseria meningitidis Z2491*  
*Streptomyces avermitilis*  
*Bacillus halodurans*  
*Bacillus subtilis*  
*Bacillus cereus ATCC14579*  
*Listeria innocua*  
*Listeria monocytogenes*  
*Enterococcus faecalis V583*  
*Staphylococcus aureus Mu50*  
*Staphylococcus aureus MW2*  
*Staphylococcus aureus N315*  
*Streptococcus pneumoniae R6*  
*Streptococcus pneumoniae TIGR 4*  
*Streptococcus agalactiae 2603*  
*Streptococcus agalactiae NEM316*  
*Streptococcus pyogenes*  
*Streptococcus pyogenes MGAS315*  
*Streptococcus pyogenes MGAS8232*  
*Streptococcus pyogenes SS11*  
*Streptococcus mutans*  
*Mycobacterium leprae*  
*Mycobacterium tuberculosis CDC1*  
*Mycobacterium tuberculosis H37R*  
*Bacteroides thetaiotaomicron VP*  
*Aquifex aeolicus*  
*Bifidobacterium longum*  
*Buchnera aphidicola*  
*Buchnera aphidicola Sg*  
*Borrelia burgdorferi*  
*Aeropyrum pernix*  
*Archaeoglobus fulgidus*

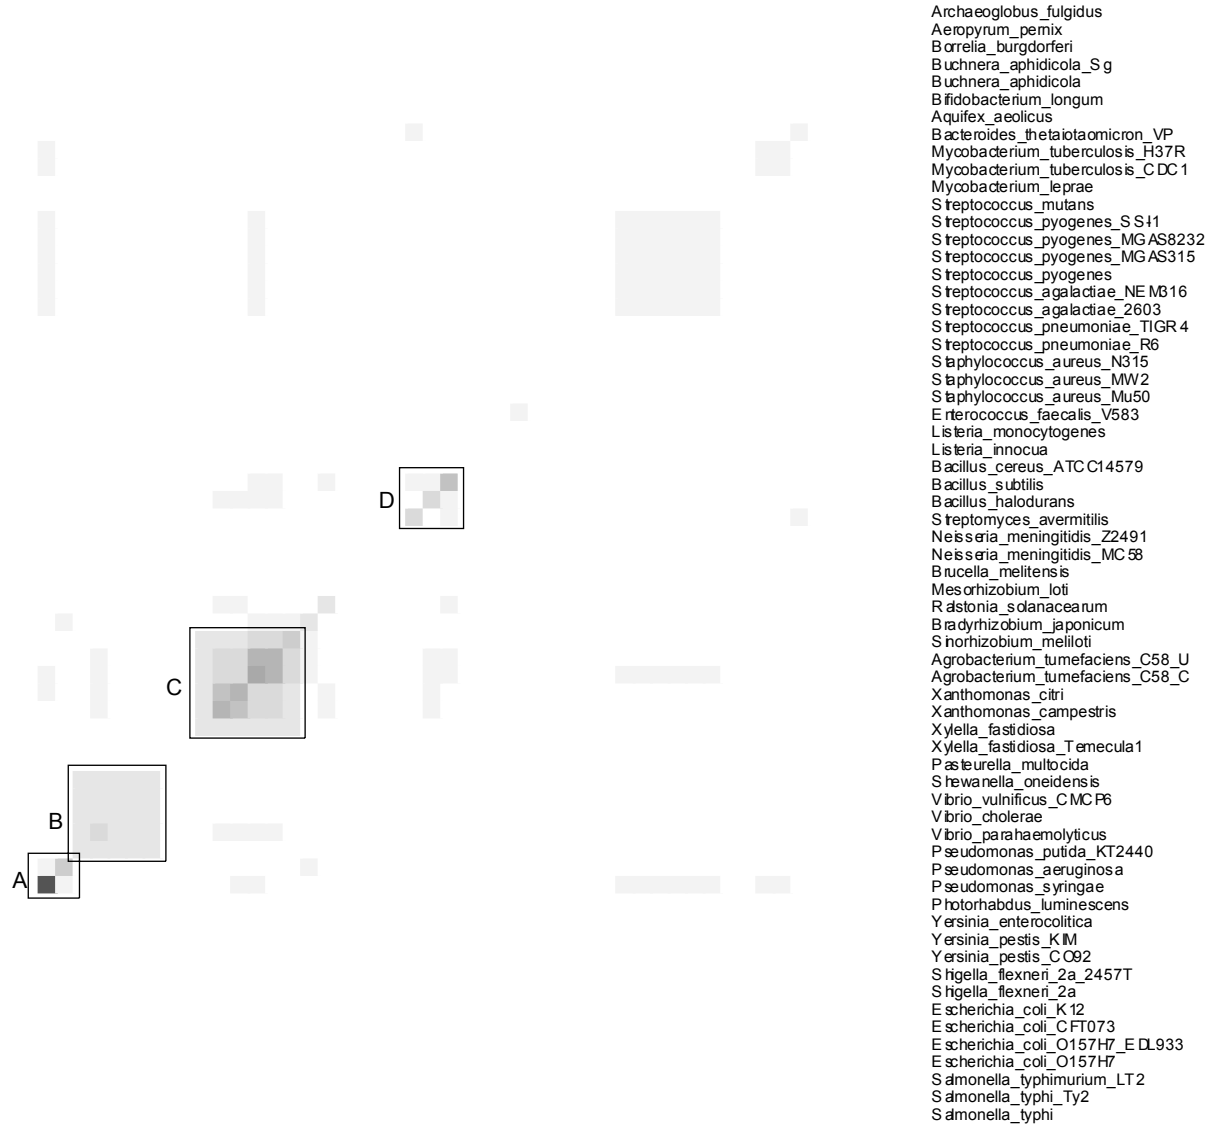

*Archaeoglobus fulgidus*  
*Aeropyrum pernix*  
*Borrelia burgdorferi*  
*Buchnera aphidicola\_Sg*  
*Buchnera aphidicola*  
*Bifidobacterium longum*  
*Aquifex aeolicus*  
*Bacteroides thetaiotaomicron VP*  
*Mycobacterium tuberculosis\_H37R*  
*Mycobacterium tuberculosis\_CDC 1*  
*Mycobacterium leprae*  
*Streptococcus mutans*  
*Streptococcus pyogenes\_SS11*  
*Streptococcus pyogenes\_MGAS8232*  
*Streptococcus pyogenes\_MGAS315*  
*Streptococcus pyogenes*  
*Streptococcus agalactiae\_NE M316*  
*Streptococcus agalactiae\_2603*  
*Streptococcus pneumoniae\_TIGR 4*  
*Streptococcus pneumoniae\_R6*  
*Staphylococcus aureus\_N315*  
*Staphylococcus aureus\_MW2*  
*Staphylococcus aureus\_Mu50*  
*Enterococcus faecalis\_V583*  
*Listeria monocytogenes*  
*Listeria innocua*  
*Bacillus cereus\_ATCC14579*  
*Bacillus subtilis*  
*Bacillus halodurans*  
*Streptomyces avermitilis*  
*Neisseria meningitidis\_Z2491*  
*Neisseria meningitidis\_MC88*  
*Bruceella melitensis*  
*Mesorhizobium loti*  
*Rhizobium loti*  
*Bradyrhizobium japonicum*  
*Sinorhizobium meliloti*  
*Agrobacterium tumefaciens\_C58\_U*  
*Agrobacterium tumefaciens\_C58\_C*  
*Xanthomonas citri*  
*Xanthomonas campestris*  
*Xylella fastidiosa*  
*Xylella fastidiosa\_Temecula1*  
*Pasteurella multocida*  
*Stenotrophomonas maltophilia*  
*Vibrio vulnificus\_CMC96*  
*Vibrio cholerae*  
*Vibrio parahaemolyticus*  
*Pseudomonas putida\_KT2440*  
*Pseudomonas aeruginosa*  
*Pseudomonas syringae*  
*Photobacterium luminescens*  
*Yersinia enterocolitica*  
*Yersinia pestis\_KIM*  
*Yersinia pestis\_CO92*  
*Shigella flexneri\_2a\_2457T*  
*Shigella flexneri\_2a*  
*Escherichia coli\_K12*  
*Escherichia coli\_CFT073*  
*Escherichia coli\_O157:H7\_E DL933*  
*Escherichia coli\_O157:H7*  
*Salmonella typhimurium\_LT2*  
*Salmonella typhi\_Ty2*  
*Salmonella typhi*
