# Supplementary material
Source: PubMed Central journal article supplement (PMC503747)
Supplement: pnas_101_30_11105__3.pdf [file pnas_101_30_11105__3.pdf]

**Table 3. Predicted coding sequences within *Eca* SCRI1043 that have a putative role in pathogenicity**

| Systematic gene name | Gene name   | Functional category | Putative function               | Similarities shown with FASTA comparison score are the best database matches (not shown for genes previously sequenced in <i>E. carotovora</i> ) and selected other database matches of note (where appropriate). Also listed are significant matches within the <i>Eca</i> 1043 genome where applicable and PFAM scores where relevant. |
|----------------------|-------------|---------------------|---------------------------------|------------------------------------------------------------------------------------------------------------------------------------------------------------------------------------------------------------------------------------------------------------------------------------------------------------------------------------------|
| ECA0800              |             | 1.1                 | Type I Secretion System protein | No significant database matches. <i>Shewanella oneidensis</i> outer membrane efflux family protein E(): 0.00079, 22.79% ID in 487 aa. <i>Escherichia coli</i> hypothetical outer-membrane lipoprotein YohG precursor E(): 0.0067, 22.56% ID in 483 aa.                                                                                   |
| ECA0801              |             | 1.1                 | Type I Secretion System protein | <i>Vibrio cholerae</i> hypothetical protein vc0913 E(): 2.3e-10, 26.29% ID in 232 aa, and to <i>Shewanella oneidensis</i> HlyD family secretion protein so3483 E(): 2.4e-09, 25.49% ID in 251 aa.                                                                                                                                        |
| ECA0802              |             | 1.1                 | Type I Secretion System protein | <i>Vibrio cholerae</i> periplasmic linker protein, putative vc1756 E(): 4e-05, 27.53% ID in 247 aa.                                                                                                                                                                                                                                      |
| ECA0803              |             | 1.1                 | Type I Secretion System protein | No significant database matches. Putative membrane protein.                                                                                                                                                                                                                                                                              |
| ECA1096*             |             | 1.1                 | Type I Secretion System protein | <i>Pseudomonas putida</i> protein secretion ABC efflux system, E(): 9.1e-67, 54.23% ID in 378 aa; <i>Escherichia coli</i> O157:H7 putative membrane spanning export protein E(): 2.9e-66, 54.3% ID in 372 aa.                                                                                                                            |
| ECA1097*             |             | 1.1                 | Type I Secretion System protein | <i>Pseudomonas putida</i> protein secretion ABC efflux system, permease and ATP-binding protein E(): 5.9e-111, 46.31% ID in 691 aa; <i>Salmonella typhi</i> putative type I secretion protein, ATP-binding protein: E(): 1.4e-103, 42.34% ID in 692 aa.                                                                                  |
| ECA1098*             |             | 1.1                 | Type I Secretion System protein | <i>Escherichia coli</i> O157:H7 putative outer membrane export protein E(): 2.7e-75, 50.56% ID in 439 aa; <i>Ralstonia solanacearum</i> putative outer membrane efflux transmembrane protein rsp1181 E(): 1.9e-23, 29.39% ID in 398 aa.                                                                                                  |
| ECA2781*             | <i>prtF</i> | 1.1                 | Type I Secretion System protein | <i>Erwinia chrysanthemi</i> proteases secretion protein PrtF precursor E(): 3.6e-123, 73.25% ID in 445 aa.                                                                                                                                                                                                                               |
| ECA2782*             | <i>prtE</i> | 1.1                 | Type I Secretion System protein | <i>Erwinia chrysanthemi</i> proteases secretion protein PrtE E(): 9.7e-110, 72.33% ID in 441 aa. ECA1535 (47.529% ID in 425 aa overlap).                                                                                                                                                                                                 |
| ECA2783*             | <i>prtD</i> | 1.1                 | Type I Secretion System protein | <i>Erwinia chrysanthemi</i> proteases secretion ATP-binding protein PrtD E(): 1.2e-155, 74.6% ID in 575 aa.                                                                                                                                                                                                                              |
| ECA3268*             |             | 1.1                 | Type I Secretion System protein | <i>Actinobacillus pleuropneumoniae</i> RTX-I toxin determinant                                                                                                                                                                                                                                                                           |

| Systematic gene name | Gene name   | Functional category | Putative function                 | Similarities shown with FASTA comparison score are the best database matches (not shown for genes previously sequenced in <i>E. carotovora</i> ) and selected other database matches of note (where appropriate). Also listed are significant matches within the Eca1043 genome where applicable and PFAM scores where relevant. |
|----------------------|-------------|---------------------|-----------------------------------|----------------------------------------------------------------------------------------------------------------------------------------------------------------------------------------------------------------------------------------------------------------------------------------------------------------------------------|
|                      |             |                     |                                   | B Apxib E(): 1.1e-55, 28.05% ID in 695 aa; <i>Pseudomonas putida</i> toxin secretion ATP-binding protein pp0167 E(): 1.1e-188, 69.83% ID in 706 aa.                                                                                                                                                                              |
| ECA3269*             |             | 1.I                 | Type I Secretion System protein   | <i>Rhizobium leguminosarum</i> PrsE protein E(): 4.6e-27, 29.72% ID in 434 aa; <i>Pseudomonas putida</i> HlyD family secretion protein pp0166 E(): 1.9e-103, 65.19% ID in 454 aa.                                                                                                                                                |
| ECA3098*             | <i>outO</i> | 1.II                | Type II Secretion System protein  |                                                                                                                                                                                                                                                                                                                                  |
| ECA3099*             | <i>outN</i> | 1.II                | Type II Secretion System protein  |                                                                                                                                                                                                                                                                                                                                  |
| ECA3100*             | <i>outM</i> | 1.II                | Type II Secretion System protein  |                                                                                                                                                                                                                                                                                                                                  |
| ECA3101*             | <i>outL</i> | 1.II                | Type II Secretion System protein  |                                                                                                                                                                                                                                                                                                                                  |
| ECA3102*             | <i>outK</i> | 1.II                | Type II Secretion System protein  |                                                                                                                                                                                                                                                                                                                                  |
| ECA3103*             | <i>outJ</i> | 1.II                | Type II Secretion System protein  |                                                                                                                                                                                                                                                                                                                                  |
| ECA3104*             | <i>outI</i> | 1.II                | Type II Secretion System protein  |                                                                                                                                                                                                                                                                                                                                  |
| ECA3105*             | <i>outH</i> | 1.II                | Type II Secretion System protein  |                                                                                                                                                                                                                                                                                                                                  |
| ECA3106*             | <i>outG</i> | 1.II                | Type II Secretion System protein  |                                                                                                                                                                                                                                                                                                                                  |
| ECA3107*             | <i>outF</i> | 1.II                | Type II Secretion System protein  |                                                                                                                                                                                                                                                                                                                                  |
| ECA3108*             | <i>outE</i> | 1.II                | Type II Secretion System protein  |                                                                                                                                                                                                                                                                                                                                  |
| ECA3109*             | <i>outD</i> | 1.II                | Type II Secretion System protein  |                                                                                                                                                                                                                                                                                                                                  |
| ECA3110*             | <i>outC</i> | 1.II                | Type II Secretion System protein  |                                                                                                                                                                                                                                                                                                                                  |
| ECA3113*             | <i>outB</i> | 1.II                | Type II Secretion System protein  |                                                                                                                                                                                                                                                                                                                                  |
| ECA3114*             | <i>outS</i> | 1.II                | Type II Secretion System protein  |                                                                                                                                                                                                                                                                                                                                  |
| ECA0199              | <i>tatA</i> | 1.II                | sec-independent translocase       | <i>Escherichia coli</i> , sec-independent protein translocase protein TatA E(): 2.5e-17, 64.83% ID in 91 aa.                                                                                                                                                                                                                     |
| ECA0200              | <i>tatB</i> | 1.II                | sec-independent translocase       | <i>Escherichia coli</i> , sec-independent protein translocase protein TatB E(): 4.4e-22, 52.82% ID in 195 aa.                                                                                                                                                                                                                    |
| ECA0201              | <i>tatC</i> | 1.II                | sec-independent translocase       | <i>Escherichia coli</i> sec-independent protein translocase protein TatC E(): 1.5e-78, 79.83% ID in 248 aa.                                                                                                                                                                                                                      |
| ECA2076*             | <i>hrcU</i> | 1.III               | Type III Secretion System protein |                                                                                                                                                                                                                                                                                                                                  |
| ECA2077*             | <i>hrcT</i> | 1.III               | Type III Secretion System protein |                                                                                                                                                                                                                                                                                                                                  |
| ECA2078*             | <i>hrcS</i> | 1.III               | Type III Secretion System protein |                                                                                                                                                                                                                                                                                                                                  |
| ECA2079*             | <i>hrcR</i> | 1.III               | Type III Secretion System protein |                                                                                                                                                                                                                                                                                                                                  |
| ECA2080*             | <i>hrcQ</i> | 1.III               | Type III Secretion System protein |                                                                                                                                                                                                                                                                                                                                  |
| ECA2081*             | <i>hrpP</i> | 1.III               | Type III Secretion System protein |                                                                                                                                                                                                                                                                                                                                  |
| ECA2082*             | <i>hrpO</i> | 1.III               | Type III Secretion System protein |                                                                                                                                                                                                                                                                                                                                  |
| ECA2083*             | <i>hrcN</i> | 1.III               | Type III Secretion System protein |                                                                                                                                                                                                                                                                                                                                  |
| ECA2084*             | <i>hrpQ</i> | 1.III               | Type III Secretion System protein |                                                                                                                                                                                                                                                                                                                                  |
| ECA2085*             | <i>hrcV</i> | 1.III               | Type III Secretion System protein |                                                                                                                                                                                                                                                                                                                                  |
| ECA2086*             | <i>hrpJ</i> | 1.III               | Type III Secretion System protein |                                                                                                                                                                                                                                                                                                                                  |

| Systematic gene name | Gene name                     | Functional category | Putative function                                                             | Similarities shown with FASTA comparison score are the best database matches (not shown for genes previously sequenced in <i>E. carotovora</i> ) and selected other database matches of note (where appropriate). Also listed are significant matches within the Eca1043 genome where applicable and PFAM scores where relevant. |
|----------------------|-------------------------------|---------------------|-------------------------------------------------------------------------------|----------------------------------------------------------------------------------------------------------------------------------------------------------------------------------------------------------------------------------------------------------------------------------------------------------------------------------|
| ECA2087*             | <i>hrpL</i>                   | 1.III               | Type III Secretion System protein                                             |                                                                                                                                                                                                                                                                                                                                  |
| ECA2088*             | <i>hrpX</i>                   | 1.III               | Type III Secretion System protein                                             |                                                                                                                                                                                                                                                                                                                                  |
| ECA2089*             | <i>hrpY</i>                   | 1.III               | Type III Secretion System protein                                             |                                                                                                                                                                                                                                                                                                                                  |
| ECA2090*             | <i>hrpS</i>                   | 1.III               | Type III Secretion System protein                                             |                                                                                                                                                                                                                                                                                                                                  |
| ECA2093*             | <i>hrpA</i>                   | 1.III               | Type III Secretion System protein                                             |                                                                                                                                                                                                                                                                                                                                  |
| ECA2094*             | <i>hrpB</i>                   | 1.III               | Type III Secretion System protein                                             |                                                                                                                                                                                                                                                                                                                                  |
| ECA2095*             | <i>hrcJ</i>                   | 1.III               | Type III Secretion System protein                                             |                                                                                                                                                                                                                                                                                                                                  |
| ECA2096*             | <i>hrpD</i>                   | 1.III               | Type III Secretion System protein                                             |                                                                                                                                                                                                                                                                                                                                  |
| ECA2097*             | <i>hrpE</i>                   | 1.III               | Type III Secretion System protein                                             |                                                                                                                                                                                                                                                                                                                                  |
| ECA2098*             | <i>hrpF</i>                   | 1.III               | Type III Secretion System protein                                             |                                                                                                                                                                                                                                                                                                                                  |
| ECA2099*             | <i>hrpG</i>                   | 1.III               | Type III Secretion System protein                                             |                                                                                                                                                                                                                                                                                                                                  |
| ECA2100*             | <i>hrcC</i>                   | 1.III               | Type III Secretion System protein                                             |                                                                                                                                                                                                                                                                                                                                  |
| ECA2101*             | <i>hrpT</i>                   | 1.III               | Type III Secretion System protein                                             |                                                                                                                                                                                                                                                                                                                                  |
| ECA2102*             | <i>hrpV</i>                   | 1.III               | Type III Secretion System protein                                             |                                                                                                                                                                                                                                                                                                                                  |
| ECA1613*             | <i>virB11</i>                 | 1.IV                | Type IV Secretion System / conjugal transfer protein                          | <i>Escherichia coli</i> VirB11 protein E(): 1e-37, 38.06% ID in 331 aa; <i>Actinobacillus actinomycetemcomitans</i> transport associated protein 9 E(): 7.1e-48, 46.01% ID in 326 aa.                                                                                                                                            |
| ECA1614*             | <i>virB10</i>                 | 1.IV                | Type IV Secretion System / conjugal transfer protein                          | <i>Escherichia coli</i> VirB10 protein E(): 1.2e-23, 32.41% ID in 401 aa.                                                                                                                                                                                                                                                        |
| ECA1615*             | <i>virB9</i>                  | 1.IV                | Type IV Secretion System / conjugal transfer protein                          | <i>Escherichia coli</i> VirB9 protein VirB9 E(): 2.5e-15, 32.52% ID in 289 aa.                                                                                                                                                                                                                                                   |
| ECA1616*             | <i>virB8</i>                  | 1.IV                | Type IV Secretion System / conjugal transfer protein                          | <i>Escherichia coli</i> VirB8 protein VirB8 E(): 2.8e-14, 29.46% ID in 224 aa.                                                                                                                                                                                                                                                   |
| ECA1616A*            | <i>virB7</i>                  | 1.IV                | Type IV Secretion System / conjugal transfer protein                          | <i>Escherichia coli</i> VirB7 protein E(): 0.7, 40% ID in 40 aa.                                                                                                                                                                                                                                                                 |
| ECA1617*             | <i>virB6</i>                  | 1.IV                | Type IV Secretion System / conjugal transfer protein                          | <i>Escherichia coli</i> VirB6 protein E(): 9e-06, 21.12% ID in 355 aa.                                                                                                                                                                                                                                                           |
| ECA1619*             | <i>virB5</i>                  | 1.IV                | Type IV Secretion System / conjugal transfer protein                          | <i>Escherichia coli</i> VirB5 protein E(): 0.00064, 22.88% ID in 236 aa.                                                                                                                                                                                                                                                         |
| ECA1620*             | <i>virB4</i> and <i>virB3</i> | 1.IV                | Type IV Secretion System / conjugal transfer protein                          | <i>Escherichia coli</i> VirB4 protein E(): 2.4e-90, 34.71% ID in 818 aa; N-terminal portion has 30% ID in 85 aa to <i>Escherichia coli</i> Pilx3 protein.                                                                                                                                                                        |
| ECA1621*             | <i>virB2</i>                  | 1.IV                | Type IV Secretion System / conjugal transfer protein                          | <i>Escherichia coli</i> VirB2 protein E(): 0.0022, 30.66% ID in 75 aa.                                                                                                                                                                                                                                                           |
| ECA1622*             | <i>virB1</i>                  | 1.IV                | Type IV Secretion System / conjugal transfer protein                          | <i>Escherichia coli</i> VirB1 protein E(): 1.1e-12, 32.27% ID in 220 aa.                                                                                                                                                                                                                                                         |
| ECA1099              |                               | 2.I                 | Type I Secretion System protein; large (3615 AA) repetitive secreted protein. | <i>Salmonella typhi</i> protein sty2875 E(): 1.9e-41, 26.46% ID in 3438 aa; <i>Yersinia pestis</i> putative autotransporter protein YapH E(): 8e-31, 23.21% ID in 3584 aa.                                                                                                                                                       |

| Systematic gene name | Gene name          | Functional category | Putative function                                                                                       | Similarities shown with FASTA comparison score are the best database matches (not shown for genes previously sequenced in <i>E. carotovora</i> ) and selected other database matches of note (where appropriate). Also listed are significant matches within the Eca1043 genome where applicable and PFAM scores where relevant. |
|----------------------|--------------------|---------------------|---------------------------------------------------------------------------------------------------------|----------------------------------------------------------------------------------------------------------------------------------------------------------------------------------------------------------------------------------------------------------------------------------------------------------------------------------|
| ECA2784*             | <i>inh</i>         | 2.I                 | Type I Secretion System protein; protease inhibitor                                                     |                                                                                                                                                                                                                                                                                                                                  |
| ECA2785*             | <i>priW</i>        | 2.I                 | Type I Secretion System protein; protease                                                               |                                                                                                                                                                                                                                                                                                                                  |
| ECA3266 *            |                    | 2.I                 | Type I Secretion System protein; large (4588AA) secreted RTX-toxin family protein.                      | <i>Ralstonia solanacearum</i> putative hemagglutinin/hemolysin-related protein rsp1180 E(): 3.1e-134, 29.53% ID in 4320 aa.                                                                                                                                                                                                      |
| ECA3267*             |                    | 2.I                 | Type I Secretion System protein; secreted protein                                                       | <i>Pseudomonas putida</i> agglutination protein precursor AggA E(): 4e-73, 47.27% ID in 440 aa.                                                                                                                                                                                                                                  |
| ECA0107*             | <i>pmeB</i>        | 2.II                | plant cell wall degrading enzyme; pectin methylesterase                                                 |                                                                                                                                                                                                                                                                                                                                  |
| ECA0804*             | <i>rhiE</i>        | 2.II                | plant cell wall degrading enzyme; rhamnogalacturonate lyase                                             | <i>Erwinia chrysanthemi</i> rhamnogalacturonase precursor RhiE: E(): 1.3e-133, 60.1% ID in 554 aa. The only other significant database matches are eukaryotic.                                                                                                                                                                   |
| ECA0852*             |                    | 2.II                | plant cell wall degrading enzyme; arabinogalactan endo-1,4-betagalactosidase or proteoglycan hydrolyase | Similar to <i>Pseudomonas fluorescens</i> arabinogalactan endo-1,4-betagalactosidase precursor gGalaA or GanA E(): 1.2e-16 33.53% ID in 325 aa.                                                                                                                                                                                  |
| ECA0931*             |                    | 2.II                | secreted virulence / avirulence associated protein.                                                     | <i>Xanthomonas campestris</i> avirulence protein E(): 3.9e-141, 57.42% ID in 613aa. Previously partially sequenced in EcaSCRI1039.                                                                                                                                                                                               |
| ECA1094*             | <i>pelB (pel3)</i> | 2.II                | plant cell wall degrading enzyme; pectate lyase                                                         |                                                                                                                                                                                                                                                                                                                                  |
| ECA1095*             | <i>pehA</i>        | 2.II                | plant cell wall degrading enzyme; endopolygalacturonase                                                 |                                                                                                                                                                                                                                                                                                                                  |
| ECA1190*             | <i>pehN</i>        | 2.II                | plant cell wall degrading enzyme; endopolygalacturonase                                                 | <i>Erwinia chrysanthemi</i> putative polygalacturonase precursor PehN 9.4e-151, 80.13% ID in 458 aa.                                                                                                                                                                                                                             |
| ECA1499*             | <i>pnl</i>         | 2.II                | plant cell wall degrading enzyme; pectin lyase                                                          |                                                                                                                                                                                                                                                                                                                                  |
| ECA1981*             | <i>celV</i>        | 2.II                | plant cell wall degrading enzyme; cellulase                                                             |                                                                                                                                                                                                                                                                                                                                  |
| ECA2220*             |                    | 2.II                | plant cell wall degrading enzyme; cellulase                                                             | <i>Bacillus subtilis</i> YoaJ E(): 4.2e-47, 53.61% ID in 235 aa; also similar to the C-terminal region of <i>Clavibacter michiganensis</i> subsp. <i>sepedonicus</i> cellulase CelA E(): 2.6e-09, 30.52% ID in 190 aa.                                                                                                           |
| ECA2331*             | <i>expl (rssA)</i> | 2.II                | secreted phospholipase                                                                                  | Previously sequenced in <i>E. carotovora</i> . Has patatin-like phospholipase PFAM domain (score 2.4e-56).                                                                                                                                                                                                                       |
| ECA2408*             | <i>paeX</i>        | 2.II                | plant cell wall degrading enzyme; pectin acetylesterase                                                 | <i>Erwinia chrysanthemi</i> pectin acetylesterase 78% ID in 310 aa, <i>Xanthomonas campestris</i> xylanase XynB E(): 3.3e-61, 56.08% ID in 296 aa.                                                                                                                                                                               |

| Systematic gene name | Gene name          | Functional category | Putative function                                                | Similarities shown with FASTA comparison score are the best database matches (not shown for genes previously sequenced in <i>E. carotovora</i> ) and selected other database matches of note (where appropriate). Also listed are significant matches within the Eca1043 genome where applicable and PFAM scores where relevant. |
|----------------------|--------------------|---------------------|------------------------------------------------------------------|----------------------------------------------------------------------------------------------------------------------------------------------------------------------------------------------------------------------------------------------------------------------------------------------------------------------------------|
| ECA2553*             |                    | 2.II                | plant cell wall degrading enzyme; pectate lyase                  | <i>Erwinia chrysanthemi</i> pectate lyase L precursor PelL E(): 9.3e-21, 39.57% ID in 422 aa.                                                                                                                                                                                                                                    |
| ECA2827*             | <i>celB (celS)</i> | 2.II                | plant cell wall degrading enzyme; cellulase.                     |                                                                                                                                                                                                                                                                                                                                  |
| ECA3111*             | <i>pehX</i>        | 2.II                | plant cell wall degrading enzyme; polygalacturonase              | <i>Erwinia chrysanthemi</i> exo-poly-alpha-D-galacturonosase precursor PehX E(): 1e-59, 48.5% ID in 635 aa.                                                                                                                                                                                                                      |
| ECA3112*             |                    | 2.II                | plant cell wall degrading enzyme; pectate lyase                  | <i>Bacillus</i> sp. pectate lyase PelK E(): 2.7e-35, 35.16% ID in 472 aa; <i>Erwinia chrysanthemi</i> pectate lyase a precursor PelA E(): 1.1e-27, 31.9% ID in 442 aa.                                                                                                                                                           |
| ECA3252*             | <i>paeY</i>        | 2.II                | plant cell wall degrading enzyme; pectin acetylsterase           | <i>Erwinia chrysanthemi</i> pectin acetylsterase PaeY E(): 8.8e-135, 61.07% ID in 542 aa.                                                                                                                                                                                                                                        |
| ECA3253*             | <i>pemA</i>        | 2.II                | plant cell wall degrading enzyme; pectin methylesterase          | <i>Erwinia chrysanthemi</i> pectinesterase a precursor PemA E(): 3.5e-98, 70.47% ID in 359 aa.                                                                                                                                                                                                                                   |
| ECA3552*             |                    | 2.II                | plant cell wall degrading enzyme; possible endopolygalacturonase | <i>Prevotella ruminicola</i> polygalacturonase E(): 3.9e-17, 23.87% ID in 423 aa; <i>Agrobacterium tumefaciens</i> polygalacturonase atu4560 E(): 2.8e-56, 36.03% ID in 444 aa.                                                                                                                                                  |
| ECA4067*             | <i>pelA/pell</i>   | 2.II                | plant cell wall degrading enzyme; pectate lyase                  | Similar to ECA4068 (88.503% ID in 374 aa overlap), and to ECA4069 (83.110% ID in 373 aa overlap).                                                                                                                                                                                                                                |
| ECA4068*             | <i>pelB/pel2</i>   | 2.II                | plant cell wall degrading enzyme; pectate lyase                  | Similar to ECA4067 (88.503% ID in 374 aa overlap), and to ECA4069 (82% ID in 373 aa overlap).                                                                                                                                                                                                                                    |
| ECA4069*             | <i>pelC/pel3</i>   | 2.II                | plant cell wall degrading enzyme; pectate lyase                  | Similar to ECA4067 (83.110% ID in 374 aa overlap), and to ECA4068 (82.038% ID in 373 aa overlap).                                                                                                                                                                                                                                |
| ECA4070*             | <i>pelZ</i>        | 2.II                | plant cell wall degrading enzyme; pectate lyase                  | <i>Erwinia chrysanthemi</i> pectate lyase precursor PelZ E(): 5.1e-120, 72.53% ID in 426 aa.                                                                                                                                                                                                                                     |
| ECA4510*             | <i>pelX (Ech)</i>  | 2.II                | plant cell wall degrading enzyme; exopolygalacturonate lyase     | <i>Erwinia chrysanthemi</i> exopolygalacturonate lyase PelX E(): 1.9e-206, 73.8% ID in 733 aa.                                                                                                                                                                                                                                   |
| ECA0257              | <i>cah</i>         | 2.II                | carbonic anhydrase.                                              | Previously sequenced only in <i>E. carotovora</i> . Has eukaryotic-type carbonic anhydrase PFAM domain (score 1.5e-22) and Prosite signature.                                                                                                                                                                                    |
| ECA0421              |                    | 2.II                | secreted lipase.                                                 | <i>Zymomonas mobilis</i> hypothetical protein E(): 2.9e-49, 41.3% ID in 368aa. Has secretory lipase PFAM domain (4.7e-07).                                                                                                                                                                                                       |
| ECA0925              |                    | 2.II                | secreted phospholipase.                                          | <i>Mus musculus</i> schwannoma-associated protein pld3 E(): 6e-08, 29.31% ID in 382aa. Has two PFAM phospholipase D active site motifs (scores 0.23 and 0.00084).                                                                                                                                                                |
| ECA1873              |                    | 2.II                | plant cell wall degrading enzyme; possible xylanase              | <i>Escherichia coli</i> O6 hypothetical protein YieL E(): 4.7e-106, 70.57% ID in 401 aa; <i>Shigella flexneri</i> putative xylanase YieL E(): 5.9e-105, 70.07% ID in 401 aa.                                                                                                                                                     |
| ECA3087              |                    | 2.II                | necrosis inducing protein                                        | <i>Vibrio</i> sp. CH-291 hypothetical protein E(): 9.1e-59,                                                                                                                                                                                                                                                                      |

| Systematic gene name | Gene name             | Functional category | Putative function                               | Similarities shown with FASTA comparison score are the best database matches (not shown for genes previously sequenced in <i>E. carotovora</i> ) and selected other database matches of note (where appropriate). Also listed are significant matches within the Eca1043 genome where applicable and PFAM scores where relevant. |
|----------------------|-----------------------|---------------------|-------------------------------------------------|----------------------------------------------------------------------------------------------------------------------------------------------------------------------------------------------------------------------------------------------------------------------------------------------------------------------------------|
|                      |                       |                     |                                                 | 55.98% ID in 259aa; <i>Phytophthora parasitica</i> necrosis-inducing protein Npp1 E(): 1.9e-07, 31.1% ID in 209aa.                                                                                                                                                                                                               |
| ECA4373              | <i>BscZ (cel8Y)</i>   | 2.II                | plant cell wall degrading enzyme; endoglucanase | <i>Escherichia coli</i> endoglucanase precursor BcsZ E(): 1.1e-87, 60.49% ID in 367 aa, <i>Erwinia chrysanthemi</i> endo-1,4-beta-D-glucanase precursor Cel8Y E(): 7e-18, 29.11% ID in 340 aa.                                                                                                                                   |
| ECA2103*             | <i>hrpN</i>           | 2.III               | Type III Secretion System secreted harpin       |                                                                                                                                                                                                                                                                                                                                  |
| ECA2112*             | <i>hrpW</i>           | 2.III               | Type III Secretion System secreted harpin       | <i>Erwinia amylovora</i> HrpW protein E(): 2.7e-36, 50.67% ID in 448 aa.                                                                                                                                                                                                                                                         |
| ECA2113*             | <i>dspE</i>           | 2.III               | Type III Secretion System effector protein      | <i>Erwinia amylovora</i> DspE or DspA E(): 1.7e-101, 39.38% ID in 1658 aa.                                                                                                                                                                                                                                                       |
| ECA2114*             | <i>dspF</i>           | 2.III               | Type III Secretion System chaperone             | <i>Erwinia amylovora</i> DspF or DspB E(): 1.8e-19, 42.85% ID in 133 aa.                                                                                                                                                                                                                                                         |
| ECA2217*             |                       | 2.III               | Type III Secretion System associated protein    | <i>Salmonella typhimurium</i> SrfC E(): 4.2e-23, 30.06% ID in 795 aa; <i>Yersinia pestis</i> putative virulence factor y2123 FASTA scores: E(): 2.9e-65, 55.12% ID in 849 aa; <i>Pseudomonas syringae</i> pv. <i>tomato</i> str.DC3000 HopPtoL 37% ID.                                                                           |
| ECA2218*             |                       | 2.III               | Type III Secretion System associated protein    | <i>Salmonella typhimurium</i> SrfB E(): 0, 57.47% ID in 997 aa; <i>Yersinia pestis</i> putative virulence factor ypo2290 E(): 2.1e-214, 73.8% ID in 1027 aa.                                                                                                                                                                     |
| ECA2219*             |                       | 2.III               | Type III Secretion System associated protein    | <i>Salmonella typhimurium</i> and <i>Salmonella typhi</i> SrfA E(): 2.4e-16, 41.06% ID in 431 aa; <i>Yersinia pestis</i> putative virulence factor y2121 E(): 4.2e-29, 51.02% ID in 488 aa.                                                                                                                                      |
| ECA2111              | <i>hrpW chaperone</i> | 2.III               | Type III Secretion System chaperone             | <i>Erwinia amylovora</i> potential HrpW-specific chaperone E(): 2e-10, 38.46% ID in 104 aa.                                                                                                                                                                                                                                      |
| ECA0980*             |                       | 2.V                 | secreted serine protease                        | <i>Pseudomonas fluorescens</i> serine protease homologue PspB E(): 1.6e-25, 28.66% ID in 1106 aa; <i>Serratia marcescens</i> extracellular serine protease precursor E(): 1.1e-16, 25.6% ID in 1082 aa.                                                                                                                          |
| ECA2163*             |                       | 2.V                 | Type V secretion system protein autotransporter | <i>Pseudomonas aeruginosa</i> PapB protein E(): 9.1e-146, 57.05% ID in 652 aa; <i>Escherichia coli</i> alkaline phosphatase isozyme conversion protein precursor Iap E(): 4e-24, 35.67% ID in 342 aa. Has a PFAM autotransporter beta-domain, score 2.1e-25.                                                                     |
| ECA0799              |                       | 2.V                 | large (3288AA) secreted protein.                | <i>Bradyrhizobium japonicum</i> Bll3563 protein E(): 8.9e-20, 22.46% ID in 3387 aa; <i>Brucella suis</i> outer membrane autotransporter bra1148 E(): 6.1e-08, 22.91% ID in 3217 aa.                                                                                                                                              |

| Systematic gene name | Gene name        | Functional category | Putative function                                                                  | Similarities shown with FASTA comparison score are the best database matches (not shown for genes previously sequenced in <i>E. carotovora</i> ) and selected other database matches of note (where appropriate). Also listed are significant matches within the Eca1043 genome where applicable and PFAM scores where relevant. |
|----------------------|------------------|---------------------|------------------------------------------------------------------------------------|----------------------------------------------------------------------------------------------------------------------------------------------------------------------------------------------------------------------------------------------------------------------------------------------------------------------------------|
| ECA0391*             | <i>hecB</i>      | 2.VI                | Two Partner Secretion System activator / transporter protein for possible adhesin. | <i>Erwinia chrysanthemi</i> HecB precursor E(): 9.6e-40, 29.33% ID in 559 aa; <i>Yersinia pestis</i> putative hemolysin activator protein ypo2491 E(): 8.5e-141, 63.86% ID in 559 aa.                                                                                                                                            |
| ECA0392*             | <i>hecA</i>      | 2.VI                | Two Partner Secretion System secreted adhesin; possible pseudogene.                | <i>Yersinia pestis</i> putative hemolysin E(): 7.4e-93, 41.25% ID in 2390 aa, <i>Ralstonia solanacearum</i> probable hemagglutinin-related protein E(): 1.5e-92, 30.39% ID in 3145 aa; <i>Erwinia chrysanthemi</i> hemolysin/hemagglutinin-like protein HecA E(): 2.6e-91, 31.08% ID in 2474 aa.                                 |
| ECA2116*             | <i>hecB</i>      | 2.VI                | Two Partner Secretion System activator / transporter protein for possible adhesin. | <i>Erwinia chrysanthemi</i> HecB E(): 9.6e-40, 29.33% ID in 559 aa; <i>Yersinia pestis</i> putative hemolysin activator protein E(): 8.5e-141, 63.86% ID in 559 aa.                                                                                                                                                              |
| ECA2117*             | <i>hecA</i>      | 2.VI                | Two Partner Secretion System secreted adhesin; possible pseudogene.                | <i>Erwinia chrysanthemi</i> hemolysin/hemagglutinin-like protein HecA precursor E(): 3.6e-110, 43.11% ID in 1148 aa.                                                                                                                                                                                                             |
| ECA2118*             | <i>hecA</i>      | 2.VI                | Two Partner Secretion System extracellular adhesin; possible pseudogene.           | <i>Erwinia chrysanthemi</i> hemolysin/hemagglutinin-like protein HecA p E(): 7.2e-116, 36.39% ID in 4407 aa.                                                                                                                                                                                                                     |
| ECA2135*             | <i>pelB</i>      | 2.VII               | plant cell wall degrading enzyme; periplasmic pectate lyase                        |                                                                                                                                                                                                                                                                                                                                  |
| ECA2402*             | <i>pelW/kdgC</i> | 2.VII               | plant cell wall degrading enzyme; pectate disaccharide lyase                       | <i>Erwinia chrysanthemi</i> pectate disaccharide-lyase PelW E(): 1.8e-175, 73.97% ID in 538 aa.                                                                                                                                                                                                                                  |
| ECA2426*             | <i>ogl</i>       | 2.VII               | plant cell wall degrading enzyme; oligogalacturonate lyase                         |                                                                                                                                                                                                                                                                                                                                  |
| ECA0722              |                  | 2.VII               | protease                                                                           | <i>Proteus mirabilis</i> STM-protease A E(): 3.6e-114, 82.03% ID in 334 aa.                                                                                                                                                                                                                                                      |
| ECA3211              | <i>prt1</i>      | 2.VII               | secreted protease                                                                  |                                                                                                                                                                                                                                                                                                                                  |
| ECA2399              | <i>kdgF</i>      | 2.VII               | pectin degradation and transport                                                   | <i>Erwinia chrysanthemi</i> pectin degradation KdgF E(): 3.3e-38, 89.09% ID in 110 aa.                                                                                                                                                                                                                                           |
| ECA2407              | <i>kdgM</i>      | 2.VII               | pectin degradation and transport                                                   | <i>Erwinia chrysanthemi</i> oligogalacturonate-specific porin KdgM E(): 7.1e-64, 67.22% ID in 238 aa.                                                                                                                                                                                                                            |
| ECA4124              | <i>kdgT</i>      | 2.VII               | pectin degradation and transport                                                   | <i>Erwinia carotovora</i> 2-keto-3-deoxygluconate permease KdgT E(): 1.4e-108, 95.91% ID in 318 aa.                                                                                                                                                                                                                              |
| ECA4360              | <i>kdgK</i>      | 2.VII               | pectin degradation and transport                                                   | <i>Erwinia chrysanthemi</i> 2-dehydro-3-deoxygluconokinase KdgK E(): 1.4e-100, 82.25% ID in 310 aa.                                                                                                                                                                                                                              |
| ECA2400              | <i>kduI1</i>     | 2.VII               | pectin degradation and transport                                                   | <i>Erwinia chrysanthemi</i> 4-deoxy-L-threo-5-hexosulose-uronate ketol-isomerase KduI E(): 8e-99, 85.61% ID in 278 aa.                                                                                                                                                                                                           |
| ECA2401              | <i>kduD</i>      | 2.VII               | pectin degradation and transport                                                   | <i>Erwinia carotovora</i> subsp. <i>atroseptica</i> 2-keto-3-                                                                                                                                                                                                                                                                    |

| Systematic gene name | Gene name    | Functional category | Putative function                                      | Similarities shown with FASTA comparison score are the best database matches (not shown for genes previously sequenced in <i>E. carotovora</i> ) and selected other database matches of note (where appropriate). Also listed are significant matches within the Eca1043 genome where applicable and PFAM scores where relevant. |
|----------------------|--------------|---------------------|--------------------------------------------------------|----------------------------------------------------------------------------------------------------------------------------------------------------------------------------------------------------------------------------------------------------------------------------------------------------------------------------------|
|                      |              |                     |                                                        | deoxygluconate oxidoreductase KduD E(): 6.3e-94, 98.41% ID in 253 aa.                                                                                                                                                                                                                                                            |
| ECA2125              | <i>kduI2</i> | 2.VII               | pectin degradation and transport                       | <i>Erwinia carotovora</i> Kdul E(): 2e-112, 96.4% ID in 278 aa, and <i>Erwinia chrysanthemi</i> 4-deoxy-L-threo-5-hexosulose-uronate ketol-isomerase Kdul E(): 7.7e-77, 64.38% ID in 278 aa.                                                                                                                                     |
| ECA0817              | <i>togT</i>  | 2.VII               | pectin degradation and transport                       | <i>Erwinia chrysanthemi</i> oligogalacturonide transporter TogT E(): 5.8e-176, 84.81% ID in 507 aa.                                                                                                                                                                                                                              |
| ECA2403              | <i>togM</i>  | 2.VII               | pectin degradation and transport                       | <i>Erwinia chrysanthemi</i> inner membrane protein TogM E(): 1.2e-115, 97.63% ID in 296 aa.                                                                                                                                                                                                                                      |
| ECA2404              | <i>togN</i>  | 2.VII               | pectin degradation and transport                       | <i>Erwinia chrysanthemi</i> inner membrane protein TogN E(): 1.7e-108, 90.03% ID in 301 aa.                                                                                                                                                                                                                                      |
| ECA2405              | <i>togA</i>  | 2.VII               | pectin degradation and transport                       | <i>Erwinia chrysanthemi</i> ABC ATPase TogA E(): 8e-119, 85.6% ID in 375 aa.                                                                                                                                                                                                                                                     |
| ECA2406              | <i>togB</i>  | 2.VII               | pectin degradation and transport                       | <i>Erwinia chrysanthemi</i> periplasmic binding protein precursor TogB E(): 3.3e-143, 84.84% ID in 429 aa.                                                                                                                                                                                                                       |
| ECA0644              | <i>exuT</i>  | 2.VII               | pectin degradation and transport                       | <i>Erwinia chrysanthemi</i> ExuT E(): 6.4e-122, 88.78% ID in 330 aa. <i>Ralstonia solanacearum</i> ExuT E(): 2.8e-99, 56.39% ID in 422 aa.                                                                                                                                                                                       |
| ECA0532              | <i>pilL</i>  | 3                   | Type IV pilus (fimbrial) protein                       | <i>Salmonella dublin</i> and <i>Salmonella typhi</i> PilL E(): 8.9e-32, 44.98% ID in 449 aa.                                                                                                                                                                                                                                     |
| ECA0533              | <i>pilM</i>  | 3                   | Type IV pilus (fimbrial) protein                       | <i>Escherichia coli</i> and <i>Salmonella typhimurium</i> PilM E(): 2.4e-05, 29.45% ID in 146 aa.                                                                                                                                                                                                                                |
| ECA0534              | <i>pilN</i>  | 3                   | Type IV pilus (fimbrial) protein                       | <i>Escherichia coli</i> and <i>Salmonella typhimurium</i> lipoprotein PilN E(): 8.1e-61, 40.71% ID in 560 aa.                                                                                                                                                                                                                    |
| ECA0535              | <i>pilO</i>  | 3                   | Type IV pilus (fimbrial) protein; probable pseudogene. | <i>Escherichia coli</i> PilO E(): 1.1e-13, 22.22% ID in 441 aa.                                                                                                                                                                                                                                                                  |
| ECA0537              | <i>pilP</i>  | 3                   | Type IV pilus (fimbrial) protein                       | <i>Escherichia coli</i> PilP E(): 0.12, 23.75% ID in 160 aa,                                                                                                                                                                                                                                                                     |
| ECA0538              | <i>pilQ</i>  | 3                   | Type IV pilus (fimbrial) protein                       | <i>Escherichia coli</i> and <i>Salmonella typhimurium</i> nucleotide-binding protein PilQ E(): 2.7e-42, 32.67% ID in 508 aa.                                                                                                                                                                                                     |
| ECA0540              | <i>pilR</i>  | 3                   | Type IV pilus (fimbrial) protein                       | <i>Escherichia coli</i> and <i>Salmonella typhimurium</i> integral membrane protein PilR E(): 7.1e-24, 29.68% ID in 347 aa.                                                                                                                                                                                                      |
| ECA0541              | <i>pilS</i>  | 3                   | Type IV pilus (fimbrial) protein                       | <i>Yersinia pseudotuberculosis</i> type IV prepilin PilS E(): 1.2e-05, 31.84% ID in 179 aa.                                                                                                                                                                                                                                      |
| ECA0542              | <i>pilT</i>  | 3                   | Type IV pilus (fimbrial) protein                       | <i>Salmonella typhi</i> and <i>Salmonella dublin</i> PilT E(): 2.3e-28, 55.07% ID in 138 aa.                                                                                                                                                                                                                                     |
| ECA0543              | <i>pilU</i>  | 3                   | Type IV pilus (fimbrial) protein                       | <i>Shigella sonnei</i> prepilin peptase PilU E(): 0.029, 26.33% ID in 224 aa.                                                                                                                                                                                                                                                    |
| ECA0544              | <i>pilV</i>  | 3                   | Type IV pilus (fimbrial) protein                       | <i>Escherichia coli</i> PilV E(): 8.8e-12, 32.47% ID in 428 aa.                                                                                                                                                                                                                                                                  |
| ECA0787              |              | 3                   | Type IV pilus (fimbrial) protein                       | <i>Rhizobium loti</i> type IV prepilin peptase, CpaA E(): 3.7e-05,                                                                                                                                                                                                                                                               |



| Systematic gene name | Gene name | Functional category | Putative function                | Similarities shown with FASTA comparison score are the best database matches (not shown for genes previously sequenced in <i>E. carotovora</i> ) and selected other database matches of note (where appropriate). Also listed are significant matches within the Eca1043 genome where applicable and PFAM scores where relevant. |
|----------------------|-----------|---------------------|----------------------------------|----------------------------------------------------------------------------------------------------------------------------------------------------------------------------------------------------------------------------------------------------------------------------------------------------------------------------------|
|                      |           |                     |                                  | 30.53% ID in 167 aa; <i>Rhizobium meliloti</i> probable CpaA2 pilus assembly protein E(): 6.4e-05, 28.48% ID in 172 aa.                                                                                                                                                                                                          |
| ECA0788              |           | 3                   | Type IV pilus (fimbrial) protein | <i>Bradyrhizobium japonicum</i> CtpC protein E(): 2.7e-09, 30.96% ID in 281 aa; <i>Vibrio vulnificus</i> flp pilus assembly protein CpaB vv12330 E(): 8.4e-09, 28.94% ID in 304 aa.                                                                                                                                              |
| ECA0789              |           | 3                   | Type IV pilus (fimbrial) protein | <i>Actinobacillus actinomycescomitans</i> rough colony protein A RcpA; <i>Escherichia coli</i> protein transport protein HofQ precursor E(): 2.9e-10, 24.71% ID in 433 aa; <i>Salmonella typhi</i> Type II Secretion System protein HofQ E(): 7e-10, 27.27% ID in 253 aa.                                                        |
| ECA0790              |           | 3                   | Type IV pilus (fimbrial) protein | <i>Agrobacterium tumefaciens</i> components of type IV pilus CtpE E(): 0.0024, 23.63% ID in 220 aa; <i>Rhizobium meliloti</i> hypothetical protein FASTA scores: E(): 0.81, 21.62% ID in 222 aa.                                                                                                                                 |
| ECA0791              |           | 3                   | Type IV pilus (fimbrial) protein | <i>Bradyrhizobium japonicum</i> protein blr3493 E(): 1.7e-20, 26.68% ID in 371 aa; <i>Caulobacter crescentus</i> pilus assembly protein CpaE 7.2e-16, 27.76% ID in 371 aa; <i>Agrobacterium tumefaciens</i> components of type IV pilus CtpF E(): 5.2e-13, 29.79% ID in 292 aa.                                                  |
| ECA0792              |           | 3                   | Type IV pilus (fimbrial) protein | <i>Caulobacter crescentus</i> CpaF E(): 6.1e-65, 45.13% ID in 452 aa; <i>Bradyrhizobium japonicum</i> component of type IV pilus blr3494 E(): 1.7e-74, 55.01% ID in 429 aa; <i>Vibrio vulnificus</i> flp pilus assembly protein E(): 6.7e-66, 44.73% ID in 465 aa.                                                               |
| ECA0793              |           | 3                   | Type IV pilus (fimbrial) protein | <i>Vibrio vulnificus</i> flp pilus assembly protein TadB E(): 7.9e-20, 28.38% ID in 310 aa; <i>Actinobacillus actinomycescomitans</i> TadB E(): 7.7e-14, 27.57% ID in 243 aa.                                                                                                                                                    |
| ECA0794              |           | 3                   | Type IV pilus (fimbrial) protein | <i>Vibrio vulnificus</i> flp pilus assembly protein TadC 2.7e-25, 31.34% ID in 319 aa; <i>Agrobacterium tumefaciens</i> components of type IV pilus CtpI E(): 2.7e-24, 34.12% ID in 296 aa.                                                                                                                                      |
| ECA0939              |           | 3                   | fimbrial protein                 | <i>Xenorhabdus nematophilus</i> fimbrial major subunit MrxA 9.2e-13, 35% ID in 180 aa; <i>Salmonella typhimurium</i> fimbrial subunit BcfA E(): 7.3e-10, 30.68% ID in 176 aa; <i>Escherichia coli</i> adhesion protein PapA E(): 4.8e-07, 26.66% ID in 150 aa.                                                                   |
| ECA0940              |           | 3                   | fimbrial protein                 | <i>Escherichia coli</i> O6 hypothetical protein c3794 E(): 8.4e-14, 27.55% ID in 352 aa.                                                                                                                                                                                                                                         |
| ECA0941              |           | 3                   | fimbrial protein                 | <i>Proteus mirabilis</i> chaperone protein PmfD E(): 8.9e-43,                                                                                                                                                                                                                                                                    |

| Systematic gene name | Gene name   | Functional category | Putative function | Similarities shown with FASTA comparison score are the best database matches (not shown for genes previously sequenced in <i>E. carotovora</i> ) and selected other database matches of note (where appropriate). Also listed are significant matches within the Eca1043 genome where applicable and PFAM scores where relevant. |
|----------------------|-------------|---------------------|-------------------|----------------------------------------------------------------------------------------------------------------------------------------------------------------------------------------------------------------------------------------------------------------------------------------------------------------------------------|
|                      |             |                     |                   | 46.72% ID in 229 aa, <i>Escherichia coli</i> chaperone protein PapD E(): 2e-36, 42.98% ID in 228 aa; <i>Escherichia coli</i> PrfD E(): 2e-36, 42.98% ID in 228 aa.                                                                                                                                                               |
| ECA0942              |             | 3                   | fimbrial protein  | <i>Photorhabdus luminescens</i> MrfC E(): 6.4e-137, 43.95% ID in 810 aa; <i>Proteus mirabilis</i> outer membrane usher protein PmfC E(): 3e-132, 42.75% ID in 807 aa; <i>Escherichia coli</i> outer membrane usher protein PapC E 1.6e-126, 43.34% ID in 849 aa.                                                                 |
| ECA0943              |             | 3                   | fimbrial protein  | <i>Escherichia coli</i> fl5 P-fimbriae major subunit precursor FfiA E(): 2.8e-17, 38.5% ID in 174 aa; <i>Serratia marcescens</i> fimbria A protein precursor SmfA E(): 1.3e-16, 39.34% ID in 183 aa.                                                                                                                             |
| ECA3075              |             | 3                   | fimbrial protein  | <i>Pseudomonas aeruginosa</i> probable pili assembly chaperone pa4651 E(): 1.3e-45, 49.78% ID in 237 aa; <i>Pseudomonas putida</i> type 1 pili usher pathway chaperone CsuC or pp2361 E(): 8.6e-40, 45.6% ID in 239 aa.                                                                                                          |
| ECA3076              |             | 3                   | fimbrial protein  | <i>Pseudomonas aeruginosa</i> hypothetical protein Pa4652 E(): 1.3e-148, 51.74% ID in 775 aa; <i>Pseudomonas putida</i> type 1 pili usher protein CsuD or pp2362 E(): 1.6e-125, 43.44% ID in 778 aa.                                                                                                                             |
| ECA3222              |             | 3                   | fimbrial protein  | <i>Pseudomonas aeruginosa</i> PilF protein E(): 4.5e-07, 28.4% ID in 169 aa; <i>Yersinia pestis</i> putative fimbrial biogenesis protein ypo2881 or y1351 E(): 4.2e-62, 71.91% ID in 235 aa.                                                                                                                                     |
| ECA1685              | <i>flhD</i> | 3                   | flagellar protein | <i>Escherichia coli</i> flagellar transcriptional activator FlhD E(): 6.7e-32, 76.47% ID in 119 aa.                                                                                                                                                                                                                              |
| ECA1686              | <i>flhC</i> | 3                   | flagellar protein |                                                                                                                                                                                                                                                                                                                                  |
| ECA1696              | <i>flhB</i> | 3                   | flagellar protein | <i>Escherichia coli</i> flagellar biosynthetic protein FlhB E(): 6.9e-93, 61.15% ID in 381 aa.                                                                                                                                                                                                                                   |
| ECA1697              | <i>flhA</i> | 3                   | flagellar protein | <i>Escherichia coli</i> flagellar biosynthesis protein FlhA E(): 2.2e-214, 83.35% ID in 691 aa.                                                                                                                                                                                                                                  |
| ECA1698              | <i>flhE</i> | 3                   | flagellar protein | <i>Escherichia coli</i> flagellar protein FlhE E(): 1.2e-12, 38.68% ID in 137 aa.                                                                                                                                                                                                                                                |
| ECA1699              | <i>flgN</i> | 3                   | flagellar protein | <i>Salmonella typhimurium</i> flagella synthesis protein FlgN E(): 2.4e-14, 38.88% ID in 144 aa.                                                                                                                                                                                                                                 |
| ECA1700              | <i>flgM</i> | 3                   | flagellar protein | <i>Escherichia coli</i> negative regulator of flagellin synthesis FlgM E(): 4.5e-14, 59.18% ID in 98 aa.                                                                                                                                                                                                                         |
| ECA1701              | <i>flgA</i> | 3                   | flagellar protein | <i>Salmonella typhimurium</i> flagella basal body P-ring formation protein FlgA E(): 2.5e-36, 48.05% ID in 206 aa.                                                                                                                                                                                                               |
| ECA1702              | <i>flgB</i> | 3                   | flagellar protein | <i>Salmonella typhimurium</i> flagellar basal-body rod protein                                                                                                                                                                                                                                                                   |

| Systematic gene name | Gene name   | Functional category | Putative function | Similarities shown with FASTA comparison score are the best database matches (not shown for genes previously sequenced in <i>E. carotovora</i> ) and selected other database matches of note (where appropriate). Also listed are significant matches within the Eca1043 genome where applicable and PFAM scores where relevant. |
|----------------------|-------------|---------------------|-------------------|----------------------------------------------------------------------------------------------------------------------------------------------------------------------------------------------------------------------------------------------------------------------------------------------------------------------------------|
|                      |             |                     |                   | FlgB E(): 2.6e-37, 77.37% ID in 137 aa.                                                                                                                                                                                                                                                                                          |
| ECA1703              | <i>flgC</i> | 3                   | flagellar protein | <i>Salmonella typhimurium</i> and <i>Salmonella typhi</i> flagellar basal-body rod protein FlgC E(): 7.9e-37, 81.34% ID in 134 aa.                                                                                                                                                                                               |
| ECA1704              | <i>flgD</i> | 3                   | flagellar protein | <i>Salmonella typhimurium</i> and <i>Salmonella typhi</i> basal-body rod modification protein FlgD E(): 1.2e-43, 54.31% ID in 232 aa.                                                                                                                                                                                            |
| ECA1705              | <i>flgE</i> | 3                   | flagellar protein | <i>Salmonella typhimurium</i> and <i>Salmonella typhi</i> flagellar hook protein FlgE E(): 9.2e-78, 58.43% ID in 409 aa.                                                                                                                                                                                                         |
| ECA1706              | <i>flgF</i> | 3                   | flagellar protein | <i>Salmonella typhimurium</i> flagellar basal-body rod protein FlgF E(): 3.9e-62, 70.4% ID in 250 aa.                                                                                                                                                                                                                            |
| ECA1707              | <i>flgG</i> | 3                   | flagellar protein | <i>Salmonella typhimurium</i> and <i>Salmonella typhi</i> flagellar basal-body rod protein FlgG E(): 1.3e-77, 82.3% ID in 260 aa.                                                                                                                                                                                                |
| ECA1708              | <i>flgH</i> | 3                   | flagellar protein | <i>Salmonella typhimurium</i> and <i>Salmonella typhi</i> flagellar L-ring protein precursor FlgH E(): 2.4e-60, 76.44% ID in 225 aa.                                                                                                                                                                                             |
| ECA1709              | <i>flgI</i> | 3                   | flagellar protein | <i>Salmonella typhimurium</i> flagellar P-ring protein precursor FlgI E(): 2.5e-98, 79.6% ID in 358 aa.                                                                                                                                                                                                                          |
| ECA1710              | <i>flgJ</i> | 3                   | flagellar protein | <i>Salmonella typhimurium</i> peptoglycan hydrolase FlgJ E(): 8.9e-65, 61.49% ID in 322 aa.                                                                                                                                                                                                                                      |
| ECA1711              | <i>flgK</i> | 3                   | flagellar protein | <i>Salmonella typhimurium</i> and <i>Salmonella typhi</i> flagellar hook-associated protein 1 FlgK E(): 4.8e-81, 55.53% ID in 569 aa.                                                                                                                                                                                            |
| ECA1712              | <i>flgL</i> | 3                   | flagellar protein | <i>Salmonella typhimurium</i> flagellar hook-associated protein 3 FlgL E(): 3.7e-61, 55.34% ID in 318 aa.                                                                                                                                                                                                                        |
| ECA1714              | <i>fliR</i> | 3                   | flagellar protein |                                                                                                                                                                                                                                                                                                                                  |
| ECA1715              | <i>fliQ</i> | 3                   | flagellar protein |                                                                                                                                                                                                                                                                                                                                  |
| ECA1716              | <i>fliP</i> | 3                   | flagellar protein |                                                                                                                                                                                                                                                                                                                                  |
| ECA1717              | <i>fliO</i> | 3                   | flagellar protein |                                                                                                                                                                                                                                                                                                                                  |
| ECA1718              | <i>fliN</i> | 3                   | flagellar protein |                                                                                                                                                                                                                                                                                                                                  |
| ECA1719              | <i>fliM</i> | 3                   | flagellar protein | <i>Salmonella typhimurium</i> flagellar motor switch protein FliM E(): 5e-113, 84.77% ID in 335 aa.                                                                                                                                                                                                                              |
| ECA1720              | <i>fliL</i> | 3                   | flagellar protein | <i>Escherichia coli</i> flagellar FliL protein E(): 5e-28, 57.23% ID in 159 aa.                                                                                                                                                                                                                                                  |
| ECA1721              | <i>fliK</i> | 3                   | flagellar protein | <i>Salmonella typhimurium</i> flagellar hook-length control protein FliK E(): 1.9e-22, 35.3% ID in 405 aa.                                                                                                                                                                                                                       |
| ECA1722              | <i>fliJ</i> | 3                   | flagellar protein | <i>Salmonella typhimurium</i> and <i>Salmonella typhi</i> flagellar FliJ protein E(): 8.3e-26, 55.78% ID in 147 aa.                                                                                                                                                                                                              |
| ECA1723              | <i>fliI</i> | 3                   | flagellar protein | <i>Salmonella typhimurium</i> flagellum-specific ATP synthase                                                                                                                                                                                                                                                                    |

| Systematic gene name | Gene name   | Functional category | Putative function                                                                   | Similarities shown with FASTA comparison score are the best database matches (not shown for genes previously sequenced in <i>E. carotovora</i> ) and selected other database matches of note (where appropriate). Also listed are significant matches within the Eca1043 genome where applicable and PFAM scores where relevant. |
|----------------------|-------------|---------------------|-------------------------------------------------------------------------------------|----------------------------------------------------------------------------------------------------------------------------------------------------------------------------------------------------------------------------------------------------------------------------------------------------------------------------------|
|                      |             |                     |                                                                                     | FliI E(): 1.5e-139, 85.24% ID in 454 aa.                                                                                                                                                                                                                                                                                         |
| ECA1724              | <i>fliH</i> | 3                   | flagellar protein                                                                   | <i>Salmonella typhimurium</i> flagellar assembly protein FliH E(): 1.6e-43, 58.36% ID in 245 aa.                                                                                                                                                                                                                                 |
| ECA1725              | <i>fliG</i> | 3                   | flagellar protein                                                                   | <i>Escherichia coli</i> flagellar motor switch protein FliG E(): 1.1e-95, 85.71% ID in 329 aa.                                                                                                                                                                                                                                   |
| ECA1726              | <i>fliF</i> | 3                   | flagellar protein                                                                   | <i>Escherichia coli</i> flagellar M-ring protein FliF (): 9.2e-77, 62.63% ID in 570 aa.                                                                                                                                                                                                                                          |
| ECA1727              | <i>fliE</i> | 3                   | flagellar protein                                                                   | <i>Escherichia coli</i> flagellar hook-basal body complex protein FliE (): 1.8e-20, 63.46% ID in 104 aa.                                                                                                                                                                                                                         |
| ECA1728              | <i>fliT</i> | 3                   | flagellar protein                                                                   | <i>Escherichia coli</i> flagellar protein FliT (): 9.7e-11, 44.14% ID in 111 aa; <i>Erwinia chrysanthemi</i> FliT protein E(): 3.1e-15, 49.16% ID in 120 aa.                                                                                                                                                                     |
| ECA1729              | <i>fliS</i> | 3                   | flagellar protein                                                                   | <i>Salmonella typhimurium</i> flagellar protein FliS E(): 1.4e-30, 69.85% ID in 136 aa; <i>Erwinia chrysanthemi</i> FliS protein FliS E(): 4.4e-33, 73.52% ID in 136 aa.                                                                                                                                                         |
| ECA1730              | <i>fliD</i> | 3                   | flagellar protein                                                                   | <i>Salmonella typhimurium</i> flagellar hook-associated protein 2 FliD (): 3.9e-44, 43.82% ID in 486 aa; <i>Erwinia chrysanthemi</i> flagellar hook associated protein 2 FliD E(): 2.2e-48, 39.25% ID in 484 aa.                                                                                                                 |
| ECA1731              | <i>fliC</i> | 3                   | flagellar protein                                                                   | <i>Erwinia chrysanthemi</i> flagellin FliC (): 3.2e-36, 65.29% ID in 291 aa.                                                                                                                                                                                                                                                     |
| ECA1739              | <i>fliA</i> | 3                   | flagellar protein; RNA polymerase sigma factor                                      | <i>Escherichia coli</i> RNA polymerase sigma factor for flagellar operon FliA E(): 1.1e-68, 82.62% ID in 236 aa.                                                                                                                                                                                                                 |
| ECA1740              | <i>fliZ</i> | 3                   | flagellar protein; alternative sigma factor regulatory protein for flagellar genes. | <i>Escherichia coli</i> FliZ protein E(): 1.7e-24, 44.93% ID in 158 aa.                                                                                                                                                                                                                                                          |
| ECA1741              | <i>fliC</i> | 3                   | flagellar protein                                                                   | <i>Salmonella rubislaw</i> flagellin FliC (): 6.3e-28, 34% ID in 497 aa; <i>Escherichia coli</i> flagellin E(): 1.9e-30, 34.86% ID in 499 aa.                                                                                                                                                                                    |
| ECA0149              |             | 4                   | lipopolysaccharide biosynthesis protein                                             | <i>Yersinia pestis</i> putative sugar transferase RafQ E(): 8.7e-82, 60.06% ID in 323 aa; <i>Serratia marcescens</i> putative heptosyl transferase III WaaQ E(): 7.2e-12, 26.23% ID in 343 aa.                                                                                                                                   |
| ECA0150              |             | 4                   | lipopolysaccharide biosynthesis protein                                             | <i>Escherichia coli</i> CoaD (): 4.1e-45, 74.05% ID in 158 aa.                                                                                                                                                                                                                                                                   |
| ECA0151              |             | 4                   | lipopolysaccharide biosynthesis protein                                             | <i>Escherichia coli</i> 3-deoxy-D-manno-octulosonic-acid transferase KdtA or WaaA E(): 2.7e-134, 78.11% ID in 425 aa.                                                                                                                                                                                                            |
| ECA0152              |             | 4                   | lipopolysaccharide biosynthesis protein                                             | <i>Paracoccidioides brasiliensis</i> putative mannosyltransferase (): 0.00027, 26.86% ID in 201 aa; <i>Pasteurella piscicida</i>                                                                                                                                                                                                 |

| Systematic gene name | Gene name   | Functional category | Putative function                                                               | Similarities shown with FASTA comparison score are the best database matches (not shown for genes previously sequenced in <i>E. carotovora</i> ) and selected other database matches of note (where appropriate). Also listed are significant matches within the Eca1043 genome where applicable and PFAM scores where relevant. |
|----------------------|-------------|---------------------|---------------------------------------------------------------------------------|----------------------------------------------------------------------------------------------------------------------------------------------------------------------------------------------------------------------------------------------------------------------------------------------------------------------------------|
|                      |             |                     |                                                                                 | capsular polysaccharide FASTA scores: E(): 1, 22.46% ID in 187 aa.                                                                                                                                                                                                                                                               |
| ECA0153              |             | 4                   | lipopolysaccharide biosynthesis protein                                         | <i>Serratia marcescens</i> lipopolysaccharide core biosynthesis glycosyl transferase KdtX E(): 3.5e-66, 65.72% ID in 248 aa.                                                                                                                                                                                                     |
| ECA0154              |             | 4                   | lipopolysaccharide biosynthesis protein                                         | <i>Edwardsiella tarda</i> putative beta1,4-galactosyltransferase WaaX E(): 9.1e-32, 40.96% ID in 249 aa.                                                                                                                                                                                                                         |
| ECA0155              |             | 4                   | part of lipopolysaccharide biosynthesis cluster but role unknown; doubtful CDS. | No significant database matches                                                                                                                                                                                                                                                                                                  |
| ECA0156              |             | 4                   | part of LPS biosynthesis cluster but role unknown.                              | No significant database matches                                                                                                                                                                                                                                                                                                  |
| ECA0157              |             | 4                   | lipopolysaccharide biosynthesis protein                                         | <i>Escherichia coli</i> lipopolysaccharide 1,2-glucosyltransferase RfaJ or WaaJ 4.4e-63, 49.69% ID in 330 aa.                                                                                                                                                                                                                    |
| ECA0158              |             | 4                   | lipopolysaccharide biosynthesis protein                                         | <i>Escherichia coli</i> lipopolysaccharide 1,3-galactosyltransferase RfaI or WaaI E(): 7.7e-60, 44.21% ID in 337 aa                                                                                                                                                                                                              |
| ECA0159              |             | 4                   | lipopolysaccharide biosynthesis protein                                         | <i>Escherichia coli</i> lipopolysaccharide core biosynthesis protein RfaG or WaaG E(): 1.2e-87, 58.69% ID in 368 aa                                                                                                                                                                                                              |
| ECA0160              |             | 4                   | lipopolysaccharide biosynthesis protein                                         | <i>Escherichia coli</i> lipopolysaccharide core biosynthesis glycosyl transferase RfaQ or WaaQ E(): 1.3e-65, 52.69% ID in 334 aa.                                                                                                                                                                                                |
| ECA0161              |             | 4                   | lipopolysaccharide biosynthesis protein                                         | <i>Escherichia coli</i> O-antigen ligase RfaL or WaaL E(): 2.7e-28, 30.54% ID in 406 aa.                                                                                                                                                                                                                                         |
| ECA0162              |             | 4                   | lipopolysaccharide biosynthesis protein                                         | <i>Escherichia coli</i> O-antigen ligase RfaL or WaaL E(): 1.2e-28, 29.22% ID in 414 aa.                                                                                                                                                                                                                                         |
| ECA0163              |             | 4                   | lipopolysaccharide biosynthesis protein                                         | <i>Escherichia coli</i> lipopolysaccharide heptosyltransferase I RfaC or WaaC E(): 6.6e-89, 71.47% ID in 319 aa.                                                                                                                                                                                                                 |
| ECA0164              |             | 4                   | lipopolysaccharide biosynthesis protein                                         | <i>Escherichia coli</i> ADP-heptose--LPS heptosyltransferase II RfaF or WaaF E(): 6.2e-108, 74.41% ID in 344 aa.                                                                                                                                                                                                                 |
| ECA0165              |             | 4                   | lipopolysaccharide biosynthesis protein                                         | <i>Escherichia coli</i> and <i>Escherichia coli</i> O157:H7 ADP-L-glycero-D-manno-heptose-6-epimerase RfaD or HtrM E(): 2.1e-106, 84.41% ID in 308 aa.                                                                                                                                                                           |
| ECA0499              | <i>wcaJ</i> | 4                   | capsular polysaccharide biosynthesis protein                                    | <i>Escherichia coli</i> putative colanic biosynthesis UDP-glucose lipid carrier transferase WcaJ E(): 6.8e-69, 43.62% ID in 463 aa; <i>Klebsiella pneumoniae</i> probable CPS biosynthesis glycosyltransferase E(): 1e-69, 43.95% ID in 455 aa.                                                                                  |
| ECA0500              |             | 4                   | capsular polysaccharide biosynthesis protein                                    | <i>Methylobacillus</i> sp. 12S EpsL E(): 4, 20.86% ID in 393 aa; <i>Vibrio vulnificus</i> conserved hypothetical protein vv12303 E(): 4e-82, 46.98% ID in 415 aa.                                                                                                                                                                |

| Systematic gene name | Gene name | Functional category | Putative function                                  | Similarities shown with FASTA comparison score are the best database matches (not shown for genes previously sequenced in <i>E. carotovora</i> ) and selected other database matches of note (where appropriate). Also listed are significant matches within the Eca1043 genome where applicable and PFAM scores where relevant. |
|----------------------|-----------|---------------------|----------------------------------------------------|----------------------------------------------------------------------------------------------------------------------------------------------------------------------------------------------------------------------------------------------------------------------------------------------------------------------------------|
| ECA0501              |           | 4                   | capsular polysaccharide biosynthesis protein       | <i>Vibrio vulnificus</i> polysaccharide export-related protein vv12304 E(): 5.2e-31, 53.61% ID in 166 aa; <i>Brucella suis</i> capsule polysaccharide export protein E(): 5.5e-18, 37.91% ID in 182 aa.                                                                                                                          |
| ECA0502              |           | 4                   | capsular polysaccharide biosynthesis protein       | <i>Rhizobium leguminosarum</i> exopolysaccharide polymerization protein PssP E(): 8.1e-10, 23.42% ID in 730 aa; <i>Vibrio cholerae</i> exopolysaccharide biosynthesis protein, putative vc0937 E(): 1.4e-44, 28.87% ID in 717 aa.                                                                                                |
| ECA0503              |           | 4                   | capsular polysaccharide biosynthesis protein       | <i>Rhizobium meliloti</i> succinoglycan biosynthesis transport protein ExoT E(): 0.042, 19.1% ID in 335 aa; <i>Vibrio vulnificus</i> hypothetical protein vv12306 E(): 1e-94, 57.56% ID in 403 aa; <i>Staphylococcus aureus</i> Cap8K E(): 2.9e-09, 19.75% ID in 400 aa.                                                         |
| ECA0504              |           | 4                   | capsular polysaccharide biosynthesis protein       | <i>Streptococcus agalactiae</i> CpsH E(): 0.76, 18.88% ID in 360 aa; <i>Vibrio vulnificus</i> hypothetical protein vv12307 E(): 7.4e-117, 61.31% ID in 455 aa.                                                                                                                                                                   |
| ECA0505              |           | 4                   | capsular polysaccharide biosynthesis protein       | <i>Vibrio vulnificus</i> putative glycosyltransferase protein vv12308 E(): 7.6e-86, 64.81% ID in 324 aa; <i>Rhizobium meliloti</i> putative glycosyltransferase protein rb1330 E(): 5.2e-37, 37.42% ID in 326 aa.                                                                                                                |
| ECA0506              |           | 4                   | capsular polysaccharide biosynthesis protein       | <i>Klebsiella pneumoniae</i> WbdC ( ): 8.9e-10, 28.04% ID in 246 aa; <i>Vibrio vulnificus</i> putative glycosyltransferase protein vv12309 E(): 5e-95, 60% ID in 400 aa.                                                                                                                                                         |
| ECA0507              |           | 4                   | capsular polysaccharide biosynthesis protein       | <i>Shigella boydii</i> putative glycosyl transferase wbdS E(): 7.8e-11, 23.69% ID in 363 aa; <i>Vibrio vulnificus</i> putative glycosyltransferase protein vv12310 E(): 3.5e-94, 66.85% ID in 362 aa.                                                                                                                            |
| ECA0508              |           | 4                   | capsular polysaccharide biosynthesis protein       | <i>Vibrio vulnificus</i> hypothetical protein vv12311 E(): 1e-16, 45.92% ID in 135 aa.                                                                                                                                                                                                                                           |
| ECA0509              |           | 4                   | capsular polysaccharide biosynthesis protein       | <i>Vibrio vulnificus</i> hypothetical protein E(): 5.5e-105, 53.91% ID in 447 aa.                                                                                                                                                                                                                                                |
| ECA0510              |           | 4                   | capsular polysaccharide biosynthesis protein       | <i>Escherichia coli</i> k30 capsule biosynthesis cluster, partial sequence E(): 2.1e-15, 36.74% ID in 166 aa; <i>Escherichia coli</i> putative colanic acid biosynthesis acetyltransferase WcaB E(): 1.8e-14, 40% ID in 150 aa.                                                                                                  |
| ECA1416              | wecA      | 4                   | exopolysaccharide / O antigen biosynthesis protein | <i>Escherichia coli</i> undecaprenyl-phosphate alpha-N-acetylglucosaminyltransferase WecA or Rfe E(): 3e-70, 52.18% ID in 343 aa.                                                                                                                                                                                                |
| ECA1417              | wza       | 4                   | exopolysaccharide / O antigen biosynthesis protein | <i>Escherichia coli</i> putative polysaccharide export protein Wza precursor E(): 3.3e-105, 68.86% ID in 379 aa.                                                                                                                                                                                                                 |

| Systematic gene name | Gene name   | Functional category | Putative function                                  | Similarities shown with FASTA comparison score are the best database matches (not shown for genes previously sequenced in <i>E. carotovora</i> ) and selected other database matches of note (where appropriate). Also listed are significant matches within the Eca1043 genome where applicable and PFAM scores where relevant. |
|----------------------|-------------|---------------------|----------------------------------------------------|----------------------------------------------------------------------------------------------------------------------------------------------------------------------------------------------------------------------------------------------------------------------------------------------------------------------------------|
| ECA1418              | <i>wzb</i>  | 4                   | exopolysaccharide / O antigen biosynthesis protein | <i>Salmonella typhimurium</i> low molecular weight protein-tyrosine-phosphatase Wzb E(): 1.5e-34, 65.73% ID in 143 aa; <i>Erwinia amylovora</i> probable low molecular weight protein-tyrosine-phosphatase AmsI E(): 5.8e-37, 69.44% ID in 144 aa.                                                                               |
| ECA1419              | <i>wzc</i>  | 4                   | exopolysaccharide / O antigen biosynthesis protein | <i>Escherichia coli</i> tyrosine-protein kinase Wzc E(): 7.9e-146, 57.67% ID in 723 aa; <i>Erwinia amylovora</i> putative tyrosine-protein kinase AmsA E(): 1e-145, 55.18% ID in 723 aa.                                                                                                                                         |
| ECA1420              | <i>rfbP</i> | 4                   | exopolysaccharide / O antigen biosynthesis protein | <i>Salmonella typhimurium</i> undecaprenyl-phosphate galactosephosphotransferase RfbP E(): 3e-129, 64.65% ID in 464 aa; <i>Erwinia amylovora</i> UDP-galactose-lipid carrier transferase amsG E(): 2.8e-131, 66.3% ID in 466 aa.                                                                                                 |
| ECA1421              | <i>rfbI</i> | 4                   | exopolysaccharide / O antigen biosynthesis protein | <i>Yersinia pestis</i> CDP-6-deoxy-L-threo-D-glycero-4-hexulose-3-dehydrase reductase AscD or RfbI E(): 2.8e-45, 45.7% ID in 326 aa.                                                                                                                                                                                             |
| ECA1422              | <i>rfbF</i> | 4                   | exopolysaccharide / O antigen biosynthesis protein | <i>Yersinia pestis</i> glucose-1-phosphate cytidyltransferase DdhA E(): 1.9e-88, 80.54% ID in 257 aa.                                                                                                                                                                                                                            |
| ECA1423              | <i>rfbG</i> | 4                   | exopolysaccharide / O antigen biosynthesis protein | <i>Salmonella typhimurium</i> CDP-glucose 4,6-dehydratase RfbG E(): 5e-105, 68.92% ID in 354 aa.                                                                                                                                                                                                                                 |
| ECA1424              | <i>rfbH</i> | 4                   | exopolysaccharide / O antigen biosynthesis protein | <i>Salmonella typhimurium</i> lipopolysaccharide biosynthesis protein RfbH E(): 3.5e-143, 78.94% ID in 437 aa.                                                                                                                                                                                                                   |
| ECA1425              |             | 4                   | exopolysaccharide / O antigen biosynthesis protein | <i>Escherichia coli</i> 2,4-dihydroxyhept-2-ene-1,7-dioic acid aldolase HpcH or HpaI E(): 4.9e-22, 32.4% ID in 250 aa.                                                                                                                                                                                                           |
| ECA1426              |             | 4                   | exopolysaccharide / O antigen biosynthesis protein | <i>Bacillus subtilis</i> acetolactate synthase large subunit IlvB E(): 5.9e-45, 32.32% ID in 563 aa.                                                                                                                                                                                                                             |
| ECA1427              |             | 4                   | exopolysaccharide / O antigen biosynthesis protein | <i>Leptospira interrogans</i> dTDP-glucose 4,6-dehydratase RfbB1 E(): 0.0023, 23.05% ID in 321 aa; <i>Pyrococcus horikoshii</i> 306aa long hypothetical UDP-glucose 4-epimerase E(): 0.011, 28.63% ID in 213 aa.                                                                                                                 |
| ECA1428              |             | 4                   | exopolysaccharide / O antigen biosynthesis protein | <i>Pseudomonas fluorescens</i> and <i>Pseudomonas putida</i> acetaldehyde dehydrogenase NahO E(): 5e-45, 44.17% ID in 292 aa.                                                                                                                                                                                                    |
| ECA1429              |             | 4                   | exopolysaccharide / O antigen biosynthesis protein | <i>Pseudomonas putida</i> 4-hydroxy-2-oxovalerate aldolase NahM E(): 8.3e-48, 43.86% ID in 342 aa.                                                                                                                                                                                                                               |
| ECA1430              |             | 4                   | exopolysaccharide / O antigen biosynthesis protein | <i>Cicer arietinum</i> dTDP-glucose 4-6-dehydratase E(): 1.7e-10, 28.52% ID in 284 aa; <i>Leptospira interrogans</i> dTDP-glucose 4,6-dehydratase RfbB4 E(): 1.2e-09, 28.67% ID in 279 aa.                                                                                                                                       |
| ECA1431              |             | 4                   | exopolysaccharide / O antigen biosynthesis protein | <i>Salmonella typhi</i> putative O-antigen transporter RfbX E(): 2.3e-41, 33.25% ID in 418 aa.                                                                                                                                                                                                                                   |

| Systematic gene name | Gene name       | Functional category | Putative function                                  | Similarities shown with FASTA comparison score are the best database matches (not shown for genes previously sequenced in <i>E. carotovora</i> ) and selected other database matches of note (where appropriate). Also listed are significant matches within the Eca1043 genome where applicable and PFAM scores where relevant. |
|----------------------|-----------------|---------------------|----------------------------------------------------|----------------------------------------------------------------------------------------------------------------------------------------------------------------------------------------------------------------------------------------------------------------------------------------------------------------------------------|
| ECA1432              |                 | 4                   | exopolysaccharide / O antigen biosynthesis protein | <i>Streptococcus agalactiae</i> CpsI E(): 2.4e-08, 26.76% ID in 213 aa; <i>Chlorobium tepidum</i> glycosyl transferase ct0919 E(): 7.9e-13, 29.48% ID in 251 aa.                                                                                                                                                                 |
| ECA1433              |                 | 4                   | exopolysaccharide / O antigen biosynthesis protein | <i>Ralstonia solanacearum</i> putative acyl transferase rsp1012 E(): 4.2e-11, 36.7% ID in 188 aa; <i>Methanococcus jannaschii</i> hypothetical protein Mj1064 E(): 5.1e-10, 31.75% ID in 211 aa.                                                                                                                                 |
| ECA1434              |                 | 4                   | exopolysaccharide / O antigen biosynthesis protein | <i>Vibrio cholerae</i> WbIE protein E(): 2.9e-09, 26.18% ID in 317 aa; <i>Streptococcus thermophilus</i> EpsG E(): 1.1e-08, 26.85% ID in 324 aa.                                                                                                                                                                                 |
| ECA1435              | <i>rfc</i>      | 4                   | exopolysaccharide / O antigen biosynthesis protein | <i>Salmonella typhimurium</i> and <i>Salmonella typhi</i> O-antigen polymerase Rfc E(): 1.4e-54, 39.58% ID in 389 aa.                                                                                                                                                                                                            |
| ECA1436              | <i>rfbU</i>     | 4                   | exopolysaccharide / O antigen biosynthesis protein | <i>Salmonella typhimurium</i> RfbU E(): 2.8e-40, 45.65% ID in 357 aa.                                                                                                                                                                                                                                                            |
| ECA1437              | <i>rfbN</i>     | 4                   | exopolysaccharide / O antigen biosynthesis protein | <i>Salmonella typhimurium</i> O antigen biosynthesis rhamnosyltransferase RfbN E(): 2.1e-53, 45.24% ID in 305 aa.                                                                                                                                                                                                                |
| ECA1438              | <i>rfbM</i>     | 4                   | exopolysaccharide / O antigen biosynthesis protein | <i>Escherichia coli</i> mannose-1-phosphate guanylyltransferase ManC or CpsB or RfbM E(): 2.1e-114, 60.88% ID in 473 aa.                                                                                                                                                                                                         |
| ECA1439              | <i>rfbK</i>     | 4                   | exopolysaccharide / O antigen biosynthesis protein | <i>Escherichia coli</i> phosphomannutase ManB or RfbK or RfbK2 E(): 8.5e-137, 74.34% ID in 456 aa.                                                                                                                                                                                                                               |
| ECA1440              | <i>rmlD</i>     | 4                   | exopolysaccharide / O antigen biosynthesis protein | <i>Escherichia coli</i> dTDP-4-dehydrorhamnose reductase RfbD or RmlD E(): 8.3e-36, 41.72% ID in 290 aa.                                                                                                                                                                                                                         |
| ECA1441              | <i>rmlC</i>     | 4                   | exopolysaccharide / O antigen biosynthesis protein | <i>Escherichia coli</i> dTDP-6-deoxy-D-glucose-3,5 epimerase RmlC E(): 5.4e-40, 59.06% ID in 171 aa.                                                                                                                                                                                                                             |
| ECA1442              | <i>rffH</i>     | 4                   | exopolysaccharide / O antigen biosynthesis protein | <i>Escherichia coli</i> and <i>Shigella flexneri</i> glucose-1-phosphate thymidyltransferase RffH E(): 7.2e-85, 76.22% ID in 286 aa.                                                                                                                                                                                             |
| ECA1443              | <i>galF</i>     | 4                   | exopolysaccharide / O antigen biosynthesis protein | <i>Escherichia coli</i> UTP-glucose-1-phosphate uridylyltransferase GalF or WcaN E(): 7.1e-74, 65.43% ID in 298 aa.                                                                                                                                                                                                              |
| ECA1777              | <i>opgG</i>     | 4                   | periplasmic glucans biosynthesis protein           | <i>Erwinia chrysanthemi</i> OpgG protein E(): 1.1e-182, 84.48% ID in 522 aa; <i>Escherichia coli</i> periplasmic glucans biosynthesis protein MdoG E(): 8.1e-166, 76.96% ID in 508 aa.                                                                                                                                           |
| ECA1778              | <i>opgH</i>     | 4                   | periplasmic glucans biosynthesis protein           | <i>Erwinia chrysanthemi</i> OpgH protein E(): 0, 83.15% ID in 855 aa; <i>Escherichia coli</i> MdoH E(): 0, 75.67% ID in 847 aa.                                                                                                                                                                                                  |
| ECA4200              | <i>wecG/ffM</i> | 4                   | enterobacterial common antigen                     | <i>Escherichia coli</i> probable UDP-N-acetyl-D-                                                                                                                                                                                                                                                                                 |



| Systematic gene name | Gene name          | Functional category | Putative function                                | Similarities shown with FASTA comparison score are the best database matches (not shown for genes previously sequenced in <i>E. carotovora</i> ) and selected other database matches of note (where appropriate). Also listed are significant matches within the Eca1043 genome where applicable and PFAM scores where relevant. |
|----------------------|--------------------|---------------------|--------------------------------------------------|----------------------------------------------------------------------------------------------------------------------------------------------------------------------------------------------------------------------------------------------------------------------------------------------------------------------------------|
|                      |                    |                     | synthesis protein                                | mannosaminuronic acid transferase WecG or RffM E(): 9.8e-68, 72.76% ID in 246 aa.                                                                                                                                                                                                                                                |
| ECA4201              | <i>WzyE</i>        | 4                   | enterobacterial common antigen synthesis protein | <i>Escherichia coli</i> putative ECA polymerase WzyE E(): 4.4e-142, 77.77% ID in 441 aa.                                                                                                                                                                                                                                         |
| ECA4202              | <i>wecF / rffT</i> | 4                   | enterobacterial common antigen synthesis protein | <i>Escherichia coli</i> 4-alpha-L-fucosyltransferase WecF or RffT E(): 7.7e-97, 65.45% ID in 359 aa.                                                                                                                                                                                                                             |
| ECA4203              | <i>wzxE</i>        | 4                   | enterobacterial common antigen synthesis protein | <i>Escherichia coli</i> and <i>Shigella flexneri</i> WzxE E(): 6.6e-111, 72.11% ID in 416 aa.                                                                                                                                                                                                                                    |
| ECA4204              | <i>rffA / wecE</i> | 4                   | enterobacterial common antigen synthesis protein | <i>Escherichia coli</i> lipopolysaccharide biosynthesis protein RffA or WecE E(): 7.4e-130, 83.77% ID in 376 aa.                                                                                                                                                                                                                 |
| ECA4205              | <i>rffC / wecD</i> | 4                   | enterobacterial common antigen synthesis protein | <i>Escherichia coli</i> lipopolysaccharide biosynthesis protein RffC or WecD E(): 1e-33, 55.78% ID in 190 aa.                                                                                                                                                                                                                    |
| ECA4206              | <i>rffG</i>        | 4                   | enterobacterial common antigen synthesis protein | <i>Escherichia coli</i> dTDP-glucose 4,6-dehydratase RffG E(): 6.4e-119, 83% ID in 353 aa.                                                                                                                                                                                                                                       |
| ECA4207              | <i>wecC / rffD</i> | 4                   | enterobacterial common antigen synthesis protein | <i>Escherichia coli</i> UDP-N-acetyl-D-mannosamine dehydrogenase WecC or RffD E(): 3.6e-130, 81.19% ID in 420 aa.                                                                                                                                                                                                                |
| ECA4208              | <i>wecB / rffE</i> | 4                   | enterobacterial common antigen synthesis protein | <i>Escherichia coli</i> UDP-N-acetylglucosamine 2-epimerase WecB or RffE E(): 8.5e-116, 77.21% ID in 373 aa.                                                                                                                                                                                                                     |
| ECA4209              | <i>wzzE</i>        | 4                   | enterobacterial common antigen synthesis protein | <i>Escherichia coli</i> lipopolysaccharide biosynthesis protein WzzE E(): 1.4e-94, 72.07% ID in 333 aa.                                                                                                                                                                                                                          |
| ECA4210              | <i>wecA / rfe</i>  | 4                   | enterobacterial common antigen synthesis protein | <i>Escherichia coli</i> undecaprenyl-phosphate alpha-N-acetylglucosaminyl 1-phosphate transferase WecA or Rfe E(): 7.4e-112, 75.97% ID in 358 aa.                                                                                                                                                                                |
| ECA0602*             | <i>cfa7</i>        | 5                   | phytotoxic polyketide synthesis protein          | <i>Pseudomonas syringae</i> type I polyketide synthase Cfa7 E(): 0, 52.6% ID in 2091 aa; <i>Streptomyces coelicolor</i> putative type I polyketide synthase sco6275 E(): 3e-183, 44.33% ID in 1845 aa.                                                                                                                           |
| ECA0603*             | <i>cfa6</i>        | 5                   | phytotoxic polyketide synthesis protein          | <i>Pseudomonas syringae</i> type I polyketide synthase Cfa6 E(): 0, 60.14% ID in 2725 aa; <i>Polyangium cellulorum</i> soraphen polyketide synthase A SorA E(): 0, 43.21% ID in 2277 aa.                                                                                                                                         |
| ECA0604*             |                    | 5                   | phytotoxic polyketide synthesis protein          | <i>Oceanobacillus iheyensis</i> O-succinylbenzoate-CoA ligase MenE E(): 7e-13, 22.99% ID in 448 aa; <i>Pseudomonas putida</i> non-ribosomal peptide synthetase domain protein pp4220 E(): 6.1e-09, 25.58% ID in 426 aa.                                                                                                          |
| ECA0606*             | <i>cfa3</i>        | 5                   | phytotoxic polyketide synthesis protein          | <i>Pseudomonas syringae</i> cfa-beta-ketoacylsynthase Cfa3 E(): 2.7e-75, 56.15% ID in 374 aa; <i>Streptomyces coelicolor</i> putative 3-oxoacyl-(acyl-carrier-protein) synthase E(): 3.6e-25, 34.45% ID in 415 aa.                                                                                                               |
| ECA0607*             | <i>cfa2</i>        | 5                   | phytotoxic polyketide synthesis                  | <i>Pseudomonas syringae</i> coronafacic acid dehydratase Cfa2                                                                                                                                                                                                                                                                    |

| Systematic gene name | Gene name   | Functional category | Putative function                                             | Similarities shown with FASTA comparison score are the best database matches (not shown for genes previously sequenced in <i>E. carotovora</i> ) and selected other database matches of note (where appropriate). Also listed are significant matches within the Eca1043 genome where applicable and PFAM scores where relevant. |
|----------------------|-------------|---------------------|---------------------------------------------------------------|----------------------------------------------------------------------------------------------------------------------------------------------------------------------------------------------------------------------------------------------------------------------------------------------------------------------------------|
|                      |             |                     | protein                                                       | E(): 3.3e-49, 76.97% ID in 165 aa.                                                                                                                                                                                                                                                                                               |
| ECA0608*             | <i>cfa1</i> | 5                   | phytotoxic polyketide synthesis protein                       | <i>Pseudomonas syringae</i> cfa-acyl carrier protein Cfa1 E(): 6.8e-17, 60% ID in 80 aa.                                                                                                                                                                                                                                         |
| ECA0609*             | <i>cfl</i>  | 5                   | phytotoxic polyketide synthesis protein                       | <i>Pseudomonas syringae</i> coronafacate ligase Cfl E(): 1.4e-71, 37.3% ID in 512 aa.                                                                                                                                                                                                                                            |
| ECA0600              |             | 5                   | phytotoxic polyketide synthesis protein                       | <i>Pseudomonas syringae</i> oxidoreductase Cfa8 E(): 6.5e-122, 74.05% ID in 397 aa; <i>Streptomyces lavendulae</i> hypothetical 45.2 kDa protein (414 aa) FASTA scores: E(): 2.2e-82, 52.39% ID in 397 aa.                                                                                                                       |
| ECA0601              |             | 5                   | phytotoxic polyketide synthesis protein                       | <i>Pseudomonas syringae</i> oxidoreductase Cfa8 E(): 8.2e-20, 45.11% ID in 133 aa.                                                                                                                                                                                                                                               |
| ECA0605              |             | 5                   | phytotoxic polyketide synthesis protein                       | No significant database matches.                                                                                                                                                                                                                                                                                                 |
| ECA1486              |             | 5                   | non-ribosomal peptide transporter                             | <i>Pseudomonas syringae</i> ATP-binding protein SyrD E(): 1.2e-54, 34.27% ID in 566 aa.                                                                                                                                                                                                                                          |
| ECA1487              |             | 5                   | non-ribosomal peptide synthetase                              | <i>Pseudomonas syringae</i> syringomycin synthetase SyrE E(): 0, 43.13% ID in 6600 aa.                                                                                                                                                                                                                                           |
| ECA1488              |             | 5                   | non-ribosomal peptide synthetase                              | <i>Pseudomonas syringae</i> syringomycin synthetase syrE E(): 0, 42.92% ID in 7655 aa                                                                                                                                                                                                                                            |
| ECA0056              |             | 6                   | iron acquisition; TonB-dependent heme receptor                | <i>Bordetella avium</i> BhuR E(): 8.3e-14, 23.68% ID in 874 aa; <i>Pasteurella multocida</i> HemR E(): 1.5e-143, 51.04% ID in 717 aa.                                                                                                                                                                                            |
| ECA0474              | <i>entD</i> | 6                   | iron acquisition; enterobactin synthetase component           | <i>Escherichia coli</i> 4'-phosphopantetheinyl transferase EntD E(): 4.1e-09, 31.49% ID in 181 aa.                                                                                                                                                                                                                               |
| ECA0475              |             | 6                   | iron acquisition; TonB-dependent siderophore receptor protein | <i>Escherichia coli</i> colicin i receptor precursor CirA or FeuA E(): 9.5e-57, 36.61% ID in 661 aa; <i>Vibrio cholerae</i> iron-regulated outer membrane virulence protein precursor IrgA E(): 1.1e-48, 29.73% ID in 676 aa.                                                                                                    |
| ECA0476              |             | 6                   | iron acquisition; transporter                                 | <i>Stigmatella aurantiaca</i> MxcK E(): 2.9e-29, 32.74% ID in 394 aa.                                                                                                                                                                                                                                                            |
| ECA0477              | <i>entC</i> | 6                   | iron acquisition; enterobactin synthetase component C         | <i>Escherichia coli</i> isochorismate synthase EntC E(): 6.1e-66, 46.31% ID in 393 aa.                                                                                                                                                                                                                                           |
| ECA0478              | <i>entE</i> | 6                   | iron acquisition; enterobactin synthetase component E         | <i>Escherichia coli</i> enterobactin synthetase component E EntE E(): 1.1e-129, 64.63% ID in 540 aa.                                                                                                                                                                                                                             |
| ECA0479              | <i>entB</i> | 6                   | iron acquisition; enterobactin synthetase component B         | <i>Escherichia coli</i> , EntB or EntG E(): 1.1e-69, 63.63% ID in 286 aa.                                                                                                                                                                                                                                                        |
| ECA0480              | <i>entF</i> | 6                   | iron acquisition; enterobactin synthetase component F         | <i>Escherichia coli</i> enterobactin synthetase component F EntF E(): 2.4e-63, 30.4% ID in 1069 aa.                                                                                                                                                                                                                              |
| ECA0481              | <i>entA</i> | 6                   | iron acquisition; enterobactin synthetase component A         | <i>Escherichia coli</i> 2,3-dihydro-2,3-dihydroxybenzoate dehydrogenase EntA E(): 6.7e-54, 59.92% ID in 252 aa.                                                                                                                                                                                                                  |

| Systematic gene name | Gene name   | Functional category | Putative function                                                          | Similarities shown with FASTA comparison score are the best database matches (not shown for genes previously sequenced in <i>E. carotovora</i> ) and selected other database matches of note (where appropriate). Also listed are significant matches within the Eca1043 genome where applicable and PFAM scores where relevant. |
|----------------------|-------------|---------------------|----------------------------------------------------------------------------|----------------------------------------------------------------------------------------------------------------------------------------------------------------------------------------------------------------------------------------------------------------------------------------------------------------------------------|
| ECA0731              | <i>fcuA</i> | 6                   | iron acquisition; ferric siderophore TonB-dependent receptor               | <i>Yersinia enterocolitica</i> ferrichrome receptor FcuA E(): 2.6e-175, 59.78% ID in 756 aa; <i>Bordetella bronchiseptica</i> putative ferric siderophore receptor BfrB E(): 1.2e-99, 39.86% ID in 725 aa.                                                                                                                       |
| ECA0811              |             | 6                   | iron acquisition; TonB-dependent ferrichrome receptor                      | <i>Vibrio cholerae</i> ferrichrome outer membrane receptor FhuA E(): 2.8e-96, 40.61% ID in 687 aa; <i>Bradyrhizobium japonicum</i> FegA E(): 1.5e-78, 35.22% ID in 738 aa.                                                                                                                                                       |
| ECA0876              | <i>iutA</i> | 6                   | iron acquisition; TonB-dependent ferric aerobactin receptor                | <i>Escherichia coli</i> ferric aerobactin receptor precursor iutA E(): 0, 75.85% ID in 733 aa; <i>Shigella boydii</i> IutA E(): 0, 75.44% ID in 733 aa.                                                                                                                                                                          |
| ECA0927              |             | 6                   | iron acquisition; putative TonB-dependent receptor                         | <i>Escherichia coli</i> probable TonB-dependent receptor yncd precursor E(): 9e-12, 22.77% ID in 751 aa; <i>Caulobacter crescentus</i> TonB-dependent receptor cc3436 E(): 4.1e-16, 25.64% ID in 772 aa.                                                                                                                         |
| ECA0935              | <i>fhuE</i> | 6                   | iron acquisition; TonB-dependent ferric receptor                           | <i>Escherichia coli</i> FhuE receptor precursor E(): 1.9e-162, 55.86% ID in 725 aa.                                                                                                                                                                                                                                              |
| ECA1073              | <i>fecE</i> | 6                   | iron acquisition; ferric citrate transport ATP-binding protein             | <i>Escherichia coli</i> FecE E(): 8.2e-64, 67.84% ID in 255 aa.                                                                                                                                                                                                                                                                  |
| ECA1074              | <i>fecD</i> | 6                   | iron acquisition; ferric citrate transport system permease protein         | <i>Escherichia coli</i> FecD E(): 1.6e-85, 69.3% ID in 316 aa.                                                                                                                                                                                                                                                                   |
| ECA1075              | <i>fecC</i> | 6                   | iron acquisition; ferric citrate transport system permease protein         | <i>Escherichia coli</i> FecC E(): 2.5e-94, 74.09% ID in 332 aa.                                                                                                                                                                                                                                                                  |
| ECA1076              | <i>fecB</i> | 6                   | iron acquisition; ferric citrate binding periplasmic protein               | <i>Escherichia coli</i> FecB E(): 1.1e-80, 70.66% ID in 300 aa.                                                                                                                                                                                                                                                                  |
| ECA1077              | <i>fecA</i> | 6                   | iron acquisition; ferric citrate transport protein                         | <i>Escherichia coli</i> FecA 0, 80.56% ID in 782 aa.                                                                                                                                                                                                                                                                             |
| ECA1078              | <i>fecR</i> | 6                   | iron acquisition; ferric citrate sensor protein                            | <i>Escherichia coli</i> protein FecR E(): 7.6e-87, 69.55% ID in 312 aa.                                                                                                                                                                                                                                                          |
| ECA1079              | <i>fecI</i> | 6                   | iron acquisition; RNA polymerase sigma factor                              | <i>Escherichia coli</i> probable RNA polymerase sigma factor FecI E(): 1.1e-48, 78.61% ID in 173 aa.                                                                                                                                                                                                                             |
| ECA1275              |             | 6                   | iron acquisition; TonB-dependent ferrichrome-iron receptor                 | <i>Anabaena</i> sp. ferrichrome-iron receptor all2610 E(): 3.4e-38, 27.33% ID in 684 aa; <i>Pseudomonas putida</i> putative outer membrane ferric siderophore receptor pp3155 E(): 2.2e-29, 27.35% ID in 691 aa.                                                                                                                 |
| ECA1534              | <i>hasF</i> | 6                   | iron acquisition; Type I Secretion System protein for heme-binding protein | <i>Pseudomonas fluorescens</i> outer membrane protein HasF E(): 1.5e-85, 54.96% ID in 433 aa.                                                                                                                                                                                                                                    |
| ECA1535              | <i>hasE</i> | 6                   | iron acquisition; Type I Secretion                                         | <i>Pseudomonas fluorescens</i> membrane fusion protein HasE                                                                                                                                                                                                                                                                      |

| Systematic gene name | Gene name   | Functional category | Putative function                                                          | Similarities shown with FASTA comparison score are the best database matches (not shown for genes previously sequenced in <i>E. carotovora</i> ) and selected other database matches of note (where appropriate). Also listed are significant matches within the Eca1043 genome where applicable and PFAM scores where relevant. |
|----------------------|-------------|---------------------|----------------------------------------------------------------------------|----------------------------------------------------------------------------------------------------------------------------------------------------------------------------------------------------------------------------------------------------------------------------------------------------------------------------------|
|                      |             |                     | System protein for heme-binding protein                                    | E(): 2.5e-67, 52.28% ID in 438 aa.                                                                                                                                                                                                                                                                                               |
| ECA1536              | <i>hasD</i> | 6                   | iron acquisition; Type I Secretion System protein for heme-binding protein | <i>Pseudomonas fluorescens</i> ABC protein HasD E(): 2.6e-129, 65.58% ID in 584 aa; <i>Erwinia chrysanthemi</i> proteases secretion ATP-binding protein PrtD E(): 5.2e-113, 59.47% ID in 570 aa. ECA2783 58.719% ID in 562 aa overlap                                                                                            |
| ECA1537              | <i>hasA</i> | 6                   | iron acquisition; extracellular heme-binding protein                       | <i>Serratia marcescens</i> hemophore HasA E(): 6.1e-27, 50.27% ID in 183 aa; <i>Pseudomonas aeruginosa</i> HasaP E(): 8.3e-25, 45.71% ID in 210 aa.                                                                                                                                                                              |
| ECA1538              | <i>hasR</i> | 6                   | iron acquisition; TonB-dependent heme receptor                             | <i>Serratia marcescens</i> HasR protein E(): 2.1e-176, 62.03% ID in 893 aa.                                                                                                                                                                                                                                                      |
| ECA2315              | <i>tonB</i> | 6                   | iron acquisition                                                           | <i>Erwinia chrysanthemi</i> TonB protein E(): 2.8e-41, 70.42% ID in 257 aa.                                                                                                                                                                                                                                                      |
| ECA2392              | <i>yfeA</i> | 6                   | iron acquisition; chelated iron transporter                                | <i>Yersinia pestis</i> periplasmic chelated iron-binding protein YfeA E(): 1.6e-89, 78.85% ID in 298 aa.                                                                                                                                                                                                                         |
| ECA2393              | <i>yfeB</i> | 6                   | iron acquisition; chelated iron transporter                                | <i>Yersinia pestis</i> chelated iron transport system membrane protein YfeB E(): 1.6e-83, 80.14% ID in 277 aa.                                                                                                                                                                                                                   |
| ECA2394              | <i>yfeC</i> | 6                   | iron acquisition; chelated iron transporter                                | <i>Yersinia pestis</i> chelated iron transport system membrane protein YfeC E(): 2.1e-93, 90.03% ID in 281 aa.                                                                                                                                                                                                                   |
| ECA2395              | <i>yfeD</i> | 6                   | iron acquisition; chelated iron transporter                                | <i>Yersinia pestis</i> chelated iron transport system membrane protein YfeD E(): 3.6e-84, 76.67% ID in 283 aa.                                                                                                                                                                                                                   |
| ECA2722              |             | 6                   | iron acquisition; exogenous ferric siderophore TonB-dependent receptor     | <i>Vibrio cholerae</i> iron-regulated outer membrane virulence protein precursor E(): 9.1e-29, 35.05% ID in 716 aa; <i>Escherichia coli</i> exogenous ferric siderophore receptor R4 E(): 2e-148, 55.45% ID in 678 aa.                                                                                                           |
| ECA2806              | <i>cbrD</i> | 6                   | iron acquisition; achromobactin transport ATP-binding protein              | <i>Erwinia chrysanthemi</i> achromobactin transport ATP-binding protein CbrD E(): 3.9e-64, 70.75% ID in 253 aa.                                                                                                                                                                                                                  |
| ECA2807              | <i>cbrC</i> | 6                   | iron acquisition; achromobactin transport system permease protein          | <i>Erwinia chrysanthemi</i> achromobactin transport system permease protein CbrC E(): 4.9e-69, 61.91% ID in 344 aa.                                                                                                                                                                                                              |
| ECA2808              | <i>cbrB</i> | 6                   | iron acquisition; achromobactin transport system permease protein          | <i>Erwinia chrysanthemi</i> achromobactin transport system permease protein CbrB E(): 8.6e-66, 58.15% ID in 325 aa.                                                                                                                                                                                                              |
| ECA2809              | <i>cbrA</i> | 6                   | iron acquisition; achromobactin-binding periplasmic protein                | <i>Erwinia chrysanthemi</i> achromobactin-binding periplasmic protein precursor CbrA E(): 1.5e-62, 63.74% ID in 262 aa.                                                                                                                                                                                                          |
| ECA2810              | <i>acr</i>  | 6                   | iron acquisition; TonB-dependent ferric achromobactin receptor             | <i>Erwinia chrysanthemi</i> Acr E(): 2.5e-108, 57.76% ID in 483 aa.                                                                                                                                                                                                                                                              |
| ECA3137              | <i>sfuA</i> | 6                   | iron acquisition; transporter                                              | <i>Serratia marcescens</i> iron(III)-binding periplasmic protein precursor SfuA E(): 1.3e-102, 82.84% ID in 338 aa; <i>Yersinia enterocolitica</i> YfuA E(): 4.7e-99, 80.17% ID in                                                                                                                                               |

| Systematic gene name | Gene name   | Functional category | Putative function                                              | Similarities shown with FASTA comparison score are the best database matches (not shown for genes previously sequenced in <i>E. carotovora</i> ) and selected other database matches of note (where appropriate). Also listed are significant matches within the Eca1043 genome where applicable and PFAM scores where relevant. |
|----------------------|-------------|---------------------|----------------------------------------------------------------|----------------------------------------------------------------------------------------------------------------------------------------------------------------------------------------------------------------------------------------------------------------------------------------------------------------------------------|
|                      |             |                     |                                                                | 338 aa.                                                                                                                                                                                                                                                                                                                          |
| ECA3138              | <i>sfuB</i> | 6                   | iron acquisition; transporter                                  | <i>Serratia marcescens</i> iron(III)-transport system permease protein SfuB E(): 7.3e-141, 71.29% ID in 526 aa; <i>Yersinia pestis</i> iron(III)-transport system permease protein SfuB E(): 2.2e-139, 70.61% ID in 524 aa.                                                                                                      |
| ECA3139              | <i>sfuC</i> | 6                   | iron acquisition; transporter                                  | <i>Serratia marcescens</i> iron(III)-transport ATP-binding protein SfuC E(): 3.5e-64, 59.59% ID in 344 aa; <i>Yersinia pestis</i> iron(III)-transport ATP-binding protein SfuC E(): 8.4e-65, 57.92% ID in 347 aa.                                                                                                                |
| ECA3241              |             | 6                   | iron acquisition; transporter                                  | <i>Yersinia pestis</i> putative solute-binding periplasmic protein of ABC transporter E(): 6.7e-37, 35.22% ID in 335 aa; <i>Agrobacterium tumefaciens</i> ABC transporter, substrate binding protein E(): 2.4e-36, 32.24% ID in 366 aa.                                                                                          |
| ECA3242              |             | 6                   | iron acquisition; transporter                                  | <i>Yersinia pestis</i> putative FecD-family membrane transport protein E(): 2.2e-108, 81.66% ID in 360 aa; <i>Salmonella typhimurium</i> putative ABC transport protein E(): 2.2e-94, 72.06% ID in 358 aa.                                                                                                                       |
| ECA3243              |             | 6                   | iron acquisition; transporter                                  | <i>Escherichia coli</i> ferric-enterobactin-transport protein E(): 7.9e-59, 67.05% ID in 255 aa; <i>Yersinia pestis</i> putative siderophore ABC transporter, ATP-binding subunit E(): 1.4e-74, 81.15% ID in 260 aa.                                                                                                             |
| ECA3380              | <i>pvcB</i> | 6                   | iron acquisition; possible novel siderophore synthesis protein | <i>Pseudomonas aeruginosa</i> pyoverdine biosynthesis protein PvcB E(): 7.7e-50, 49.43% ID in 263 aa.                                                                                                                                                                                                                            |
| ECA3381              | <i>pvcA</i> | 6                   | iron acquisition; possible novel siderophore synthesis protein | <i>Pseudomonas aeruginosa</i> pyoverdine biosynthesis protein PvcA E(): 2.3e-70, 61.38% ID in 303 aa.                                                                                                                                                                                                                            |
| ECA3564              |             | 6                   | iron acquisition; iron-chelating periplasmic-binding protein   | <i>Escherichia coli</i> iron-chelating periplasmic-binding protein E(): 7.3e-53, 47.19% ID in 303 aa; <i>Methanosarcina acetivorans</i> iron ma1222 E(): 1.2e-30, 33.72% ID in 338 aa.                                                                                                                                           |
| ECA3565              |             | 6                   | iron acquisition; TonB dependant ferrichrome receptor          | <i>Yersinia enterocolitica</i> ferrichrome receptor FcuA E(): 2.8e-42, 29.09% ID in 787 aa; <i>Escherichia coli</i> O6 hypothetical protein E(): 1.5e-160, 57.22% ID in 720 aa.                                                                                                                                                  |
| ECA3781              |             | 6                   | iron acquisition; TonB dependent siderophore receptor          | <i>Escherichia coli</i> ferrienterobactin receptor precursor FepA E(): 1.6e-186, 63.68% ID in 738 aa.                                                                                                                                                                                                                            |
| ECA3781              | <i>fepA</i> | 6                   | iron acquisition; TonB dependent siderophore receptor          | <i>Escherichia coli</i> ferrienterobactin receptor precursor FepA E(): 1.6e-186, 63.68% ID in 738 aa; <i>Pseudomonas aeruginosa</i> ferric enterobactin receptor precursor pfea E(): 1.1e-187, 66.1% ID in 717 aa.                                                                                                               |
| ECA4115              |             | 6                   | iron acquisition; TonB-dependent siderophore receptor          | <i>Ralstonia solanacearum</i> probable ferric siderophore receptor protein E(): 2.3e-136, 51.09% ID in 734 aa; <i>Vibrio</i>                                                                                                                                                                                                     |

| Systematic gene name | Gene name   | Functional category | Putative function                                                  | Similarities shown with FASTA comparison score are the best database matches (not shown for genes previously sequenced in <i>E. carotovora</i> ) and selected other database matches of note (where appropriate). Also listed are significant matches within the Eca1043 genome where applicable and PFAM scores where relevant. |
|----------------------|-------------|---------------------|--------------------------------------------------------------------|----------------------------------------------------------------------------------------------------------------------------------------------------------------------------------------------------------------------------------------------------------------------------------------------------------------------------------|
|                      |             |                     |                                                                    | <i>anguillarum</i> ferric anguibactin receptor precursor fatA E(): 3.5e-79, 35.45% ID in 722 aa.                                                                                                                                                                                                                                 |
| ECA4116              |             | 6                   | iron acquisition; possible siderophore (aerobactin) synthesis gene | <i>Escherichia coli</i> aerobactin siderophore biosynthesis protein IucC E(): 9.5e-19, 29.59% ID in 321 aa.                                                                                                                                                                                                                      |
| ECA4198              |             | 6                   | iron or phosphate acquisition; phytase                             | <i>Pseudomonas syringae</i> phytase PhyM E(): 3.4e-77, 48.73% ID in 433 aa; <i>Escherichia coli</i> glucose-1-phosphatase precursor Agp or E(): 1.5e-31, 31.08% ID in 415 aa.                                                                                                                                                    |
| ECA4254              |             | 6                   | iron acquisition; transporter                                      | <i>Escherichia coli</i> ferrichrome transport ATP-binding protein FhuC E(): 1.2e-25, 37.5% ID in 256 aa; <i>Brucella melitensis</i> iron(III) dicitrate transport ATP-binding protein bmeii0537 E(): 6e-28, 42.21% ID in 244 aa.                                                                                                 |
| ECA4255              |             | 6                   | iron acquisition; transporter                                      | <i>Rhizobium loti</i> iron(III) ABC transporter, periplasmic-binding protein mlr8228 E(): 8e-77, 62.38% ID in 319 aa; <i>Pseudomonas aeruginosa</i> hypothetical protein Pa2913 E(): 1.3e-50, 45.57% ID in 316 aa.                                                                                                               |
| ECA4256              |             | 6                   | iron acquisition; transporter                                      | <i>Bordetella avium</i> BhuU E(): 1.1e-33, 38.8% ID in 317 aa; <i>Rhizobium loti</i> ABC transporter, permease protein mlr8229 E(): 1.3e-61, 54.4% ID in 329 aa.                                                                                                                                                                 |
| ECA4302              | <i>sftP</i> | 6                   | iron acquisition; TonB-dependent receptor                          | <i>Pseudomonas putida</i> SftP SWALL:Q9R9W7 E(): 5e-33, 37.71% ID in 753 aa; <i>Xanthomonas axonopodis</i> TonB-dependent receptor FyuA E(): 1.7e-22, 23.65% ID in 782 aa.                                                                                                                                                       |
| ECA4451              | <i>hmsS</i> | 6                   | iron acquisition and storage; hemin storage protein                | <i>Yersinia pestis</i> HmsS E(): 8.8e-07, 28.77% ID in 139 aa.                                                                                                                                                                                                                                                                   |
| ECA4452              | <i>hmsR</i> | 6                   | iron acquisition and storage; hemin storage protein                | <i>Yersinia pestis</i> HmsR E(): 3.8e-136, 73.24% ID in 441 aa.                                                                                                                                                                                                                                                                  |
| ECA4453              | <i>hmsF</i> | 6                   | iron acquisition and storage; hemin storage protein                | <i>Yersinia pestis</i> HmsF E(): 8.5e-166, 58.42% ID in 671 aa.                                                                                                                                                                                                                                                                  |
| ECA4454              | <i>hmsH</i> | 6                   | iron acquisition and storage; hemin storage protein                | <i>Yersinia pestis</i> HmsH E(): 8.5e-166, 58.42% ID in 671 aa.                                                                                                                                                                                                                                                                  |
| ECA3251*             | <i>hmpX</i> | 7                   | defence against oxidative burst                                    | <i>Erwinia chrysanthemi</i> flavohemoprotein HmpX E(): 1.3e-112, 70.52% ID in 397 aa.                                                                                                                                                                                                                                            |
| ECA3597*             | <i>msrA</i> | 7                   | defence against oxidative burst                                    | <i>Erwinia chrysanthemi</i> peptide methionine sulfoxide reductase MsrA E(): 2.6e-72, 80.95% ID in 210 aa.                                                                                                                                                                                                                       |
| ECA0092              | <i>sodA</i> | 7                   | defence against oxidative burst                                    | <i>Erwinia chrysanthemi</i> manganese superoxide dismutase SodA E(): 3.7e-73, 87.98% ID in 208 aa.                                                                                                                                                                                                                               |
| ECA0330              | <i>tolC</i> | 7                   | plant antimicrobial compound resistance protein                    | <i>Escherichia coli</i> outer membrane protein TolC precursor E(): 4.1e-124, 75.32% ID in 466 aa, <i>Erwinia chrysanthemi</i> outer membrane protein TolC E(): 2.3e-128, 77.89% ID in                                                                                                                                            |

| Systematic gene name | Gene name   | Functional category | Putative function                                           | Similarities shown with FASTA comparison score are the best database matches (not shown for genes previously sequenced in <i>E. carotovora</i> ) and selected other database matches of note (where appropriate). Also listed are significant matches within the Eca1043 genome where applicable and PFAM scores where relevant. |
|----------------------|-------------|---------------------|-------------------------------------------------------------|----------------------------------------------------------------------------------------------------------------------------------------------------------------------------------------------------------------------------------------------------------------------------------------------------------------------------------|
|                      |             |                     |                                                             | 466 aa.                                                                                                                                                                                                                                                                                                                          |
| ECA1859              | <i>sufA</i> | 7                   | defence against oxidative burst                             | <i>Erwinia chrysanthemi</i> SufA protein E(): 2.9e-33, 68.29% ID in 123 aa; <i>Escherichia coli</i> SufA E(): 3e-30, 67.52% ID in 117 aa.                                                                                                                                                                                        |
| ECA1860              | <i>sufB</i> | 7                   | defence against oxidative burst                             | <i>Erwinia chrysanthemi</i> SufB protein SufB E(): 1.6e-185, 88.6% ID in 500 aa; <i>Escherichia coli</i> SufB E(): 2.1e-176, 84.4% ID in 500 aa.                                                                                                                                                                                 |
| ECA1861              | <i>sufC</i> | 7                   | defence against oxidative burst                             | <i>Escherichia coli</i> probable ATP-dependent transporter SufC E(): 2.7e-71, 85.08% ID in 248 aa; <i>Erwinia chrysanthemi</i> SufC E(): 6.7e-72, 85.88% ID in 248 aa.                                                                                                                                                           |
| ECA1862              | <i>sufD</i> | 7                   | defence against oxidative burst                             | <i>Escherichia coli</i> SufD E(): 1e-99, 61.5% ID in 413 aa; <i>Erwinia chrysanthemi</i> SufD protein 1.6e-114, 69.78% ID in 417 aa.                                                                                                                                                                                             |
| ECA1863              | <i>sufS</i> | 7                   | defence against oxidative burst                             | <i>Escherichia coli</i> selenocysteine lyase CsdB or SufS E(): 3e-113, 70.69% ID in 406 aa; and to <i>Erwinia chrysanthemi</i> cysteine desulfurase sufS E(): 4.6e-123, 77.72% ID in 404 aa.                                                                                                                                     |
| ECA1864              | <i>sufE</i> | 7                   | defence against oxidative burst                             | <i>Escherichia coli</i> SufE E(): 1.9e-35, 70.07% ID in 137 aa; <i>Erwinia chrysanthemi</i> SufE protein E(): 7.4e-39, 73.91% ID in 138 aa.                                                                                                                                                                                      |
| ECA1909              | <i>katB</i> | 7                   | defence against oxidative burst; catalase peroxidase        | <i>Legionella pneumophila</i> catalase-peroxidase KatB E(): 0, 78.28% ID in 723 aa.                                                                                                                                                                                                                                              |
| ECA1973              | <i>sapF</i> | 7                   | plant antimicrobial peptide resistance protein              | <i>Erwinia chrysanthemi</i> SapF E(): 5.2e-80, 88.8% ID in 268 aa; <i>Salmonella typhimurium</i> peptide transport system ATP-binding protein SapF E(): 9e-75, 80.89% ID in 267 aa.                                                                                                                                              |
| ECA1974              | <i>sapD</i> | 7                   | plant antimicrobial peptide resistance protein              | <i>Erwinia chrysanthemi</i> SapD E(): 1.6e-113, 86.32% ID in 329 aa; <i>Salmonella typhimurium</i> peptide transport system ATP-binding protein SapD E(): 6.3e-111, 85.36% ID in 328 aa.                                                                                                                                         |
| ECA1975              | <i>sapC</i> | 7                   | plant antimicrobial peptide resistance protein              | <i>Erwinia chrysanthemi</i> SapC protein E(): 1.5e-89, 78.37% ID in 296 aa; <i>Salmonella typhi</i> peptide transport system permease protein SapC E(): 2.5e-87, 75.33% ID in 296 aa.                                                                                                                                            |
| ECA1976              | <i>sapB</i> | 7                   | plant antimicrobial peptide resistance protein              | <i>Erwinia chrysanthemi</i> SapB protein S E(): 2.2e-84, 71.65% ID in 321 aa, <i>Salmonella typhi</i> SapB 9.2e-94, 73.2% ID in 321 aa.                                                                                                                                                                                          |
| ECA1977              | <i>sapA</i> | 7                   | plant antimicrobial peptide resistance protein              | <i>Erwinia chrysanthemi</i> SapA protein E(): 1.5e-178, 80.92% ID in 540 aa; <i>Salmonella typhimurium</i> SapA E(): 6.1e-161, 71.4% ID in 535 aa.                                                                                                                                                                               |
| ECA2532              | <i>pqiB</i> | 7                   | defence against oxidative burst; paraquat inducible protein | <i>Escherichia coli</i> paraquat-inducible protein B PqiB E(): 3.8e-141, 66.72% ID in 544 aa.                                                                                                                                                                                                                                    |

| Systematic gene name | Gene name   | Functional category | Putative function                                                    | Similarities shown with FASTA comparison score are the best database matches (not shown for genes previously sequenced in <i>E. carotovora</i> ) and selected other database matches of note (where appropriate). Also listed are significant matches within the Eca1043 genome where applicable and PFAM scores where relevant. |
|----------------------|-------------|---------------------|----------------------------------------------------------------------|----------------------------------------------------------------------------------------------------------------------------------------------------------------------------------------------------------------------------------------------------------------------------------------------------------------------------------|
| ECA2533              | <i>pqiA</i> | 7                   | defence against oxidative burst; paraquat inducible protein          | <i>Escherichia coli</i> paraquat-inducible protein PqiA E(): 3.7e-111, 66.42% ID in 411 aa.                                                                                                                                                                                                                                      |
| ECA2984              | <i>xenA</i> | 7                   | defence against oxidative burst; flavoprotein reductase              | <i>Pseudomonas putida</i> xenobiotic reductase XenA E(): 2.4e-114, 75.96% ID in 362 aa; <i>Xanthomonas campestris</i> xenobiotic flavin oxidoreductase A frp E(): 2.5e-104, 70.44% ID in 362 aa.                                                                                                                                 |
| ECA3167              | <i>ohr</i>  | 7                   | defence against oxidative burst; peroxide resistance protein         | <i>Xanthomonas axonopodis</i> organic hydroperoxide resistance protein Ohr E(): 7.1e-36, 71.94% ID in 139 aa; <i>Ralstonia solanacearum</i> probable organic hydroperoxide resistance protein Ohr E(): 2.7e-40, 77.3% ID in 141 aa.                                                                                              |
| ECA3168              | <i>ohrR</i> | 7                   | defence against oxidative burst; peroxide resistance protein         | <i>Xanthomonas campestris</i> transcriptional regulator OhrR E(): 1.2e-34, 69.06% ID in 139 aa.                                                                                                                                                                                                                                  |
| ECA3942              | <i>ahpC</i> | 7                   | defence against oxidative burst; peroxide resistance protein         | <i>Escherichia coli</i> and <i>Shigella flexneri</i> alkyl hydroperoxide reductase C22 protein AhpC E(): 1.3e-63, 83.87% ID in 186 aa.                                                                                                                                                                                           |
| ECA2521*             | <i>mviN</i> | 8                   | putative virulence factor                                            | <i>Escherichia coli</i> and <i>Escherichia coli</i> O157:H7 virulence factor MviN homolog E(): 1.2e-160, 81.99% ID in 511 aa; <i>Yersinia pestis</i> putative membrane protein mvin E(): 5.1e-165, 84.51% ID in 510 aa.                                                                                                          |
| ECA2522*             | <i>mviM</i> | 8                   | putative virulence factor                                            | <i>Salmonella typhimurium</i> virulence factor MviM E(): 2.9e-71, 63.3% ID in 297 aa; <i>Escherichia coli</i> virulence factor MviM E(): 1.2e-67, 60% ID in 300 aa                                                                                                                                                               |
| ECA3559*             | <i>rhiN</i> | 8                   | plant inducible protein                                              | <i>Erwinia chrysanthemi</i> RhiN E(): 9e-146, 87.07% ID in 379 aa; <i>Salmonella typhimurium</i> putative cytoplasmic protein E(): 1.5e-128, 75.72% ID in 379 aa.                                                                                                                                                                |
| ECA3749*             |             | 8                   | plant inducible protein                                              | <i>Erwinia chrysanthemi</i> RhiN E(): 1.8e-53, 45.01% ID in 311 aa; <i>Agrobacterium tumefaciens</i> hypothetical protein atu4561 E(): 4.9e-74, 53.46% ID in 361 aa. ECA3559 43.810% ID in 315 aa overlap.                                                                                                                       |
| ECA0274              |             | 8                   | hypothetical protein only<br>matching proteins from plant pathogens. | <i>Xanthomonas campestris</i> hypothetical protein Xcc1623 E(): 1.7e-15, 38.65% ID in 194 aa. No other significant database matches.                                                                                                                                                                                             |
| ECA0766              |             | 8                   | hypothetical protein only<br>matching proteins from plant pathogens  | <i>Xanthomonas campestris</i> hypothetical protein xcc3622 E(): 5.2e-16, 36.15% ID in 177 aa; <i>Xanthomonas axonopodis</i> hypothetical protein xac0573 E(): 7.7e-15, 35.02% ID in 177 aa. Note that the only significant database matches are to <i>Xanthomonas</i> spp.                                                       |
| ECA0767              |             | 8                   | hypothetical protein only<br>matching proteins from plant pathogens  | <i>Xanthomonas campestris</i> hypothetical protein xcc3298 E(): 3e-10, 33.33% ID in 174 aa; <i>Xanthomonas campestris</i> hypothetical protein xcc3128 E(): 3.2e-10, 34.44% ID in                                                                                                                                                |



| Systematic gene name | Gene name                                 | Functional category | Putative function                                              | Similarities shown with FASTA comparison score are the best database matches (not shown for genes previously sequenced in <i>E. carotovora</i> ) and selected other database matches of note (where appropriate). Also listed are significant matches within the Eca1043 genome where applicable and PFAM scores where relevant. |
|----------------------|-------------------------------------------|---------------------|----------------------------------------------------------------|----------------------------------------------------------------------------------------------------------------------------------------------------------------------------------------------------------------------------------------------------------------------------------------------------------------------------------|
|                      |                                           |                     |                                                                | 180 aa. Note that the only significant database matches are to <i>Xanthomonas</i> spp.                                                                                                                                                                                                                                           |
| ECA3083              | <i>vacJ</i>                               | 8                   | putative virulence factor                                      | <i>Shigella flexneri</i> VacJ lipoprotein 1.2e-75, 71.71% ID in 251 aa; <i>Yersinia pestis</i> VacJ E(): 3.3e-80, 76.68% ID in 253 aa.                                                                                                                                                                                           |
| ECA0482              |                                           | 8                   | non-ribosomal peptide biosynthesis protein                     | <i>Bacillus subtilis</i> fengycin synthetase FenE E(): 1.3e-104, 31.95% ID in 1546 aa; <i>Pseudomonas putida</i> non-ribosomal peptide synthetase domain protein, E(): 1.1e-112, 31.67% ID in 2033 aa.                                                                                                                           |
| ECA0483              |                                           | 8                   | non-ribosomal peptide biosynthesis protein                     | <i>Tolypothrix</i> sp. PCC 7601/1 peptide synthetase TpsA E(): 4.5e-41, 30.3% ID in 561 aa; <i>Pseudomonas syringae</i> syringomycin biosynthesis enzyme 1 SyrB1 E(): 1e-40, 32.3% ID in 517 aa.                                                                                                                                 |
| ECA0045              |                                           | 8                   | resistance to complement killing                               | <i>Salmonella typhimurium</i> resistance to complement killing Rck or pslt009 E(): 7.9e-27, 44.68% id in 188 aa.<br><i>Salmonella typhimurium</i> virulence membrane protein PagC precursor or stm1246 E(): 3.5e-26, 45.05% ID in 182 aa.                                                                                        |
| ECA0008              | <i>qseB</i>                               | 9                   | regulator; may link quorum sensing to flagellar motility       | <i>Escherichia coli</i> transcriptional regulatory protein QseB S E(): 3.1e-59, 68.34% ID in 218 aa.                                                                                                                                                                                                                             |
| ECA0007              | <i>qseC</i>                               | 9                   | regulator; may link quorum sensing to flagellar motility       | <i>Escherichia coli</i> sensor protein QseC E(): 7.4e-94, 56.15% ID in 447 aa.                                                                                                                                                                                                                                                   |
| ECA0030              | <i>typA</i> (bipA)                        | 9                   | pathogenicity regulator                                        | <i>Escherichia coli</i> GTP-binding protein TypA or BipA E(): 1.1e-189, 90.18% ID in 591 aa.                                                                                                                                                                                                                                     |
| ECA0105              | <i>expl</i> ( <i>carI</i> , <i>hslI</i> ) | 9                   | pathogenicity regulator; autoinducer synthesis protein         |                                                                                                                                                                                                                                                                                                                                  |
| ECA0106              | <i>expR</i>                               | 9                   | pathogenicity regulator; transcriptional activator protein     | Similar to ECA1561 (67.8399% ID in 199 aa overlap).                                                                                                                                                                                                                                                                              |
| ECA0643              | <i>exuR</i>                               | 9                   | pathogenicity regulator; exu regulon transcriptional regulator |                                                                                                                                                                                                                                                                                                                                  |
| ECA0809              | <i>hexY</i>                               | 9                   | pathogenicity regulator; LysR-family                           |                                                                                                                                                                                                                                                                                                                                  |
| ECA0917              | <i>rspA</i>                               | 9                   | regulator; may link quorum sensing to starvation sensing       | <i>Escherichia coli</i> starvation sensing protein RspA E(): 5.7e-163, 92.57% ID in 404 aa.                                                                                                                                                                                                                                      |
| ECA0918              | <i>rspB</i>                               | 9                   | regulator; may link quorum sensing to starvation sensing       | <i>Escherichia coli</i> starvation sensing protein RspB E(): 5.6e-94, 73.45% ID in 339 aa.                                                                                                                                                                                                                                       |
| ECA1022              | <i>aepA</i>                               | 9                   | pathogenicity regulator                                        |                                                                                                                                                                                                                                                                                                                                  |
| ECA1202              | <i>rscC</i>                               | 9                   | pathogenicity regulator; capsule synthesis                     | <i>Escherichia coli</i> sensor protein RcsC E(): 1.6e-216, 58.97% ID in 953 aa.                                                                                                                                                                                                                                                  |
| ECA1203              | <i>rscB</i>                               | 9                   | pathogenicity regulator; capsule synthesis                     | <i>Escherichia coli</i> capsular synthesis regulator component B RcsB E(): 1.2e-66, 92.52% ID in 214 aa.                                                                                                                                                                                                                         |

| Systematic gene name | Gene name   | Functional category | Putative function                                          | Similarities shown with FASTA comparison score are the best database matches (not shown for genes previously sequenced in <i>E. carotovora</i> ) and selected other database matches of note (where appropriate). Also listed are significant matches within the Eca1043 genome where applicable and PFAM scores where relevant. |
|----------------------|-------------|---------------------|------------------------------------------------------------|----------------------------------------------------------------------------------------------------------------------------------------------------------------------------------------------------------------------------------------------------------------------------------------------------------------------------------|
| ECA1561              |             | 9                   | pathogenicity regulator; quorum sensing LuxR homologue     | <i>Erwinia chrysanthemi</i> transcriptional activator protein EchR E(): 5e-67, 72.35% ID in 246 aa; <i>Erwinia carotovora</i> transcriptional activator protein ExpR E(): 1.3e-57, 59.5% ID in 242 aa. Similar to Eca0106 ExpR 67.839% ID in 199 aa overlap.                                                                     |
| ECA1665              | <i>hns</i>  | 9                   | pathogenicity regulator; global regulator                  | <i>Escherichia coli</i> , DNA-binding protein H-NS E(): 3.4e-22, 61.19% ID in 134 aa; <i>Erwinia chrysanthemi</i> regulatory protein hnS E(): 1.5e-22, 61.65% ID in 133 aa. Also similar to ECA2893 (87.970% ID in 133 aa overlap) ECA2328 (61.654% ID in 133 aa overlap).                                                       |
| ECA1931              | <i>hor</i>  | 9                   | pathogenicity regulator; global regulator                  |                                                                                                                                                                                                                                                                                                                                  |
| ECA1971              | <i>aidA</i> | 9                   | quorum sensing regulator                                   | <i>Ralstonia solanacearum</i> AidA E(): 2.2e-11, 32.75% ID in 174 aa.                                                                                                                                                                                                                                                            |
| ECA1989              | <i>tyrR</i> | 9                   | pathogenicity regulator                                    | <i>Erwinia herbicola</i> transcriptional regulatory protein TyrR E(): 1.8e-138, 71.12% ID in 523 aa.                                                                                                                                                                                                                             |
| ECA2035              | <i>pecM</i> | 9                   | pathogenicity regulator                                    | <i>Erwinia chrysanthemi</i> PecM protein E(): 4e-39, 42.75% ID in 276 aa                                                                                                                                                                                                                                                         |
| ECA2036              | <i>pecS</i> | 9                   | pathogenicity regulator                                    | <i>Erwinia chrysanthemi</i> regulatory protein PecS E(): 5.5e-25, 48.76% ID in 162 aa                                                                                                                                                                                                                                            |
| ECA2328              | <i>hns</i>  | 9                   | pathogenicity regulator; global regulator                  | <i>Erwinia chrysanthemi</i> Hns regulatory protein E(): 1.2e-39, 91.11% ID in 135 aa; <i>Escherichia coli</i> , DNA-binding protein H-NS E(): 8.1e-36, 84.32% ID in 134 aa. Also similar to ECA2893 (62.406% ID in 133 aa overlap) and to ECA1665 (61.654% ID in 133 aa overlap).                                                |
| ECA2330              | <i>expM</i> | 9                   | pathogenicity regulator                                    |                                                                                                                                                                                                                                                                                                                                  |
| ECA2425              | <i>kdgR</i> | 9                   | pectin degradation repressor                               |                                                                                                                                                                                                                                                                                                                                  |
| ECA2435              | <i>rdgA</i> | 9                   | regulator of pectin lyase production                       |                                                                                                                                                                                                                                                                                                                                  |
| ECA2437              | <i>rdgB</i> | 9                   | regulator of pectin lyase production                       |                                                                                                                                                                                                                                                                                                                                  |
| ECA2445              | <i>pehR</i> | 9                   | two-component response regulator of virulence determinants |                                                                                                                                                                                                                                                                                                                                  |
| ECA2446              | <i>pehS</i> | 9                   | two-component response regulator of virulence determinants |                                                                                                                                                                                                                                                                                                                                  |
| ECA2724              | <i>rscR</i> | 9                   | pathogenicity regulator; LysR-family                       | <i>Yersinia enterocolitica</i> RscR E(): 4.4e-91, 78.62% ID in 290 aa; <i>Escherichia coli</i> hypothetical transcriptional regulator yeie E(): 1.1e-90, 76.57% ID in 286 aa                                                                                                                                                     |

| Systematic gene name | Gene name          | Functional category | Putative function                         | Similarities shown with FASTA comparison score are the best database matches (not shown for genes previously sequenced in <i>E. carotovora</i> ) and selected other database matches of note (where appropriate). Also listed are significant matches within the Eca1043 genome where applicable and PFAM scores where relevant. |
|----------------------|--------------------|---------------------|-------------------------------------------|----------------------------------------------------------------------------------------------------------------------------------------------------------------------------------------------------------------------------------------------------------------------------------------------------------------------------------|
| ECA2893              | <i>hns</i>         | 9                   | pathogenicity regulator; global regulator | <i>Escherichia coli</i> DNA-binding protein h-ns E(): 4.1e-23, 62.68% ID in 134 aa; <i>Erwinia chrysanthemi</i> Hns regulatory protein 3.1e-23, 63.15% ID in 133 aa. Also similar to ECA1665 (87.970% ID in 133 aa overlap) and to ECA2328 (62.406% ID in 133 aa overlap)                                                        |
| ECA3030              | <i>hexA</i>        | 9                   | pathogenicity regulator; LysR-family      | Identical to ECA3032                                                                                                                                                                                                                                                                                                             |
| ECA3032              | <i>hexA</i>        | 9                   | pathogenicity regulator; LysR-family      | Identical to ECA3030                                                                                                                                                                                                                                                                                                             |
| ECA3366              | <i>rsmA / csrA</i> | 9                   | carbon storage regulator                  |                                                                                                                                                                                                                                                                                                                                  |
| ECA3695              |                    | 9                   | pathogenicity regulator                   | <i>Erwinia carotovora</i> DNA-binding protein RdgB E(): 1.8e-22, 60.19% ID in 103 aa; <i>Salmonella typhi</i> putative bacteriophage transcriptional regulator sty1591 SE(): 5.5e-35, 67.44% ID in 129 aa. Also similar to ECA2437, 59.259% ID in 108 aa overlap.                                                                |
| ECA4123              | <i>rexZ</i>        | 9                   | pathogenicity regulator; exoenzymes       |                                                                                                                                                                                                                                                                                                                                  |
| ECA4259              | <i>cytR</i>        | 9                   | pathogenicity regulator                   |                                                                                                                                                                                                                                                                                                                                  |

\*Included as a pathogenicity gene in the comparative analyses based on feature class qualifier 5.1.5 (see GenBank/EMBL accession no. BX950851 for feature class qualifiers).

CDSs are grouped by putative functional categories: 1, protein secretion machinery (and associated regulators); 1.I, type I secretion; 1.II, type II secretion; 1.III, type III secretion; 1.IV, type IV secretion; 2, secreted proteins (and their chaperones) and plant cell-wall degrading enzymes; 2.I, type I secretion; 2.II, type II secretion; 2.III, type III secretion; 2.IV, type IV secretion; 2.V, type V secretion; 2.VI, two-partner secretion system; 2.VII, nonsecreted cell-wall degrading enzymes and proteins of unknown secretion mechanism; 3, surface appendages; 4, other cell envelope components (extracellular polysaccharide/lipopolysaccharide/osmoregulated periplasmic glucans); 5, phytotoxin-associated; 6, iron acquisition and storage; 7, protection against plant defense mechanisms; 8, miscellaneous; 9, regulators of pathogenicity.
