# Supplementary material
Source: PubMed Central journal article supplement (PMC503747)

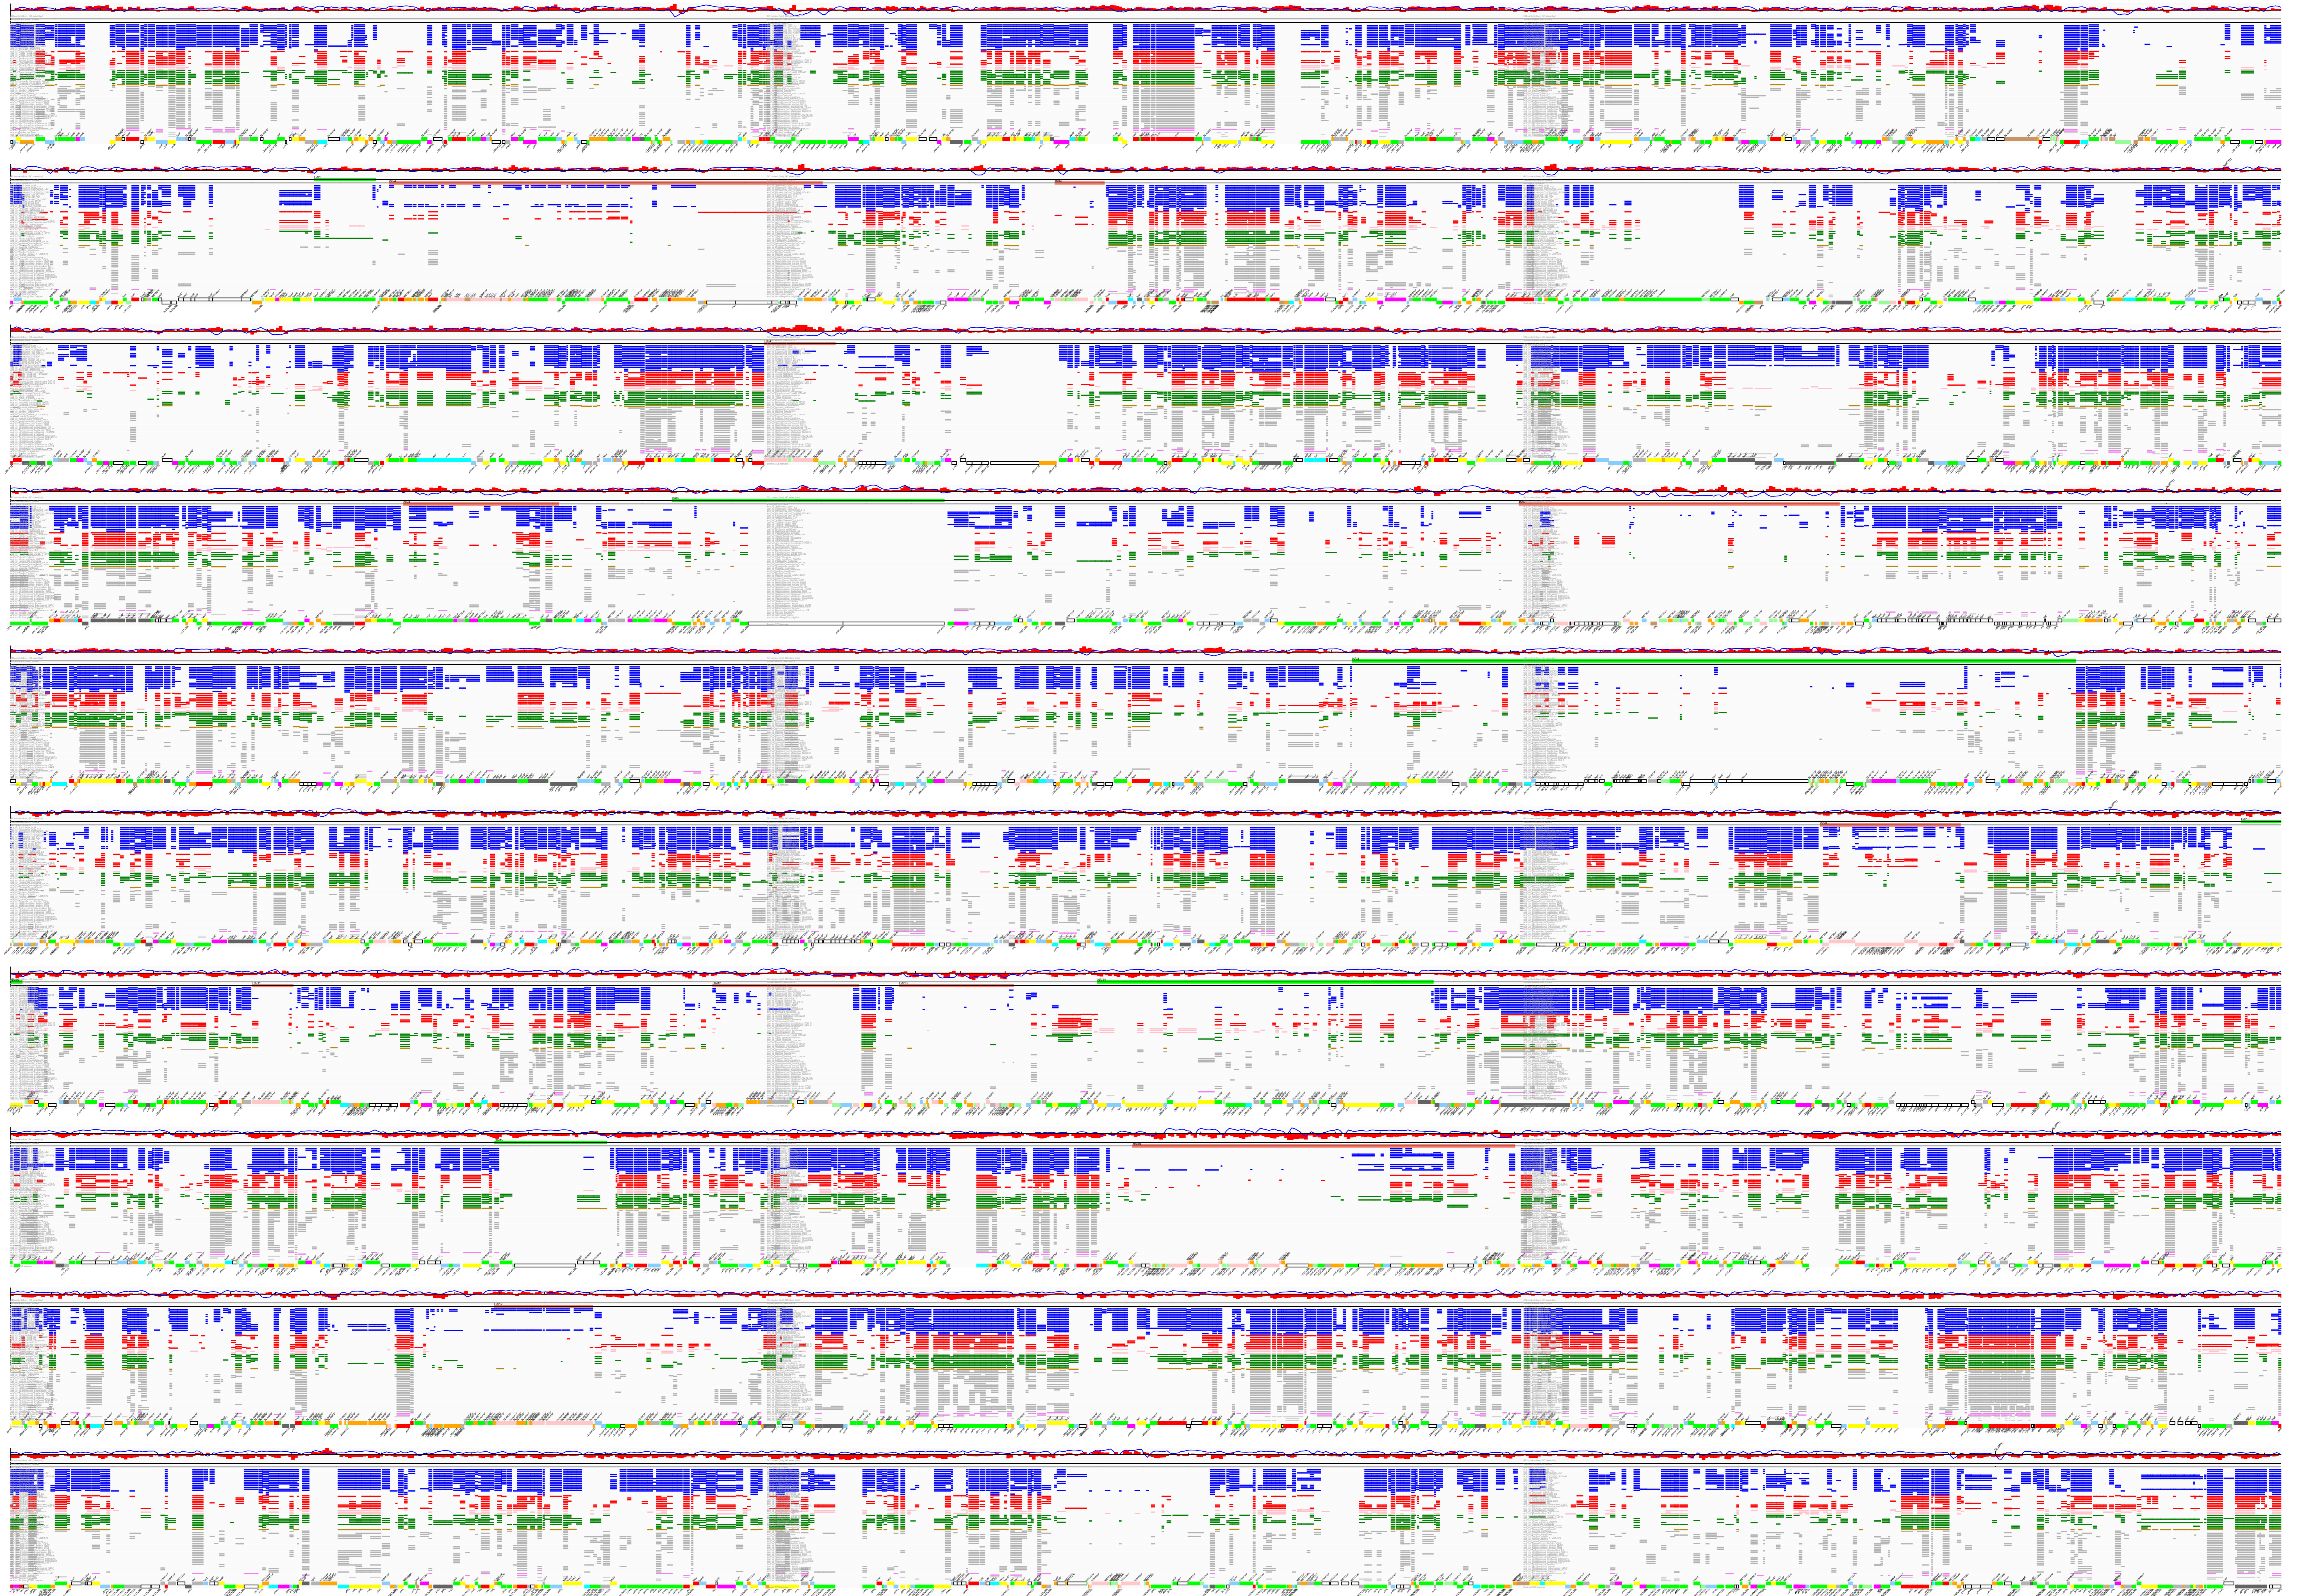

Supplement: pnas_101_30_11105__1.pdf [file pnas_101_30_11105__1.pdf]
